# Supplementary material for: A DNA barcode reference library of the French Polynesian shore fishes
Source: bioRxiv or medRxiv preprint supplement (doi:10.1101/595793), 2019-06-07

# BOLD TaxonID Tree

Title : Tree Result - DS-INDOF (2192 records selected)  
Date : 22-Mar-2019  
Data Type : Nucleotide  
Distance Model : Kimura 2 Parameter  
Marker : COI-5P  
Colourization : [blue]=Stop Codons [red]=Contamination or misidentification

Label : Sample ID  
Label : Process ID  
Label : Taxon  
Label : GenBank Accession

Sequence Count : 2190  
Species count : 540  
Genus count : 232  
Family count : 61  
Unidentified : 157

BIN Count : 617

2 %

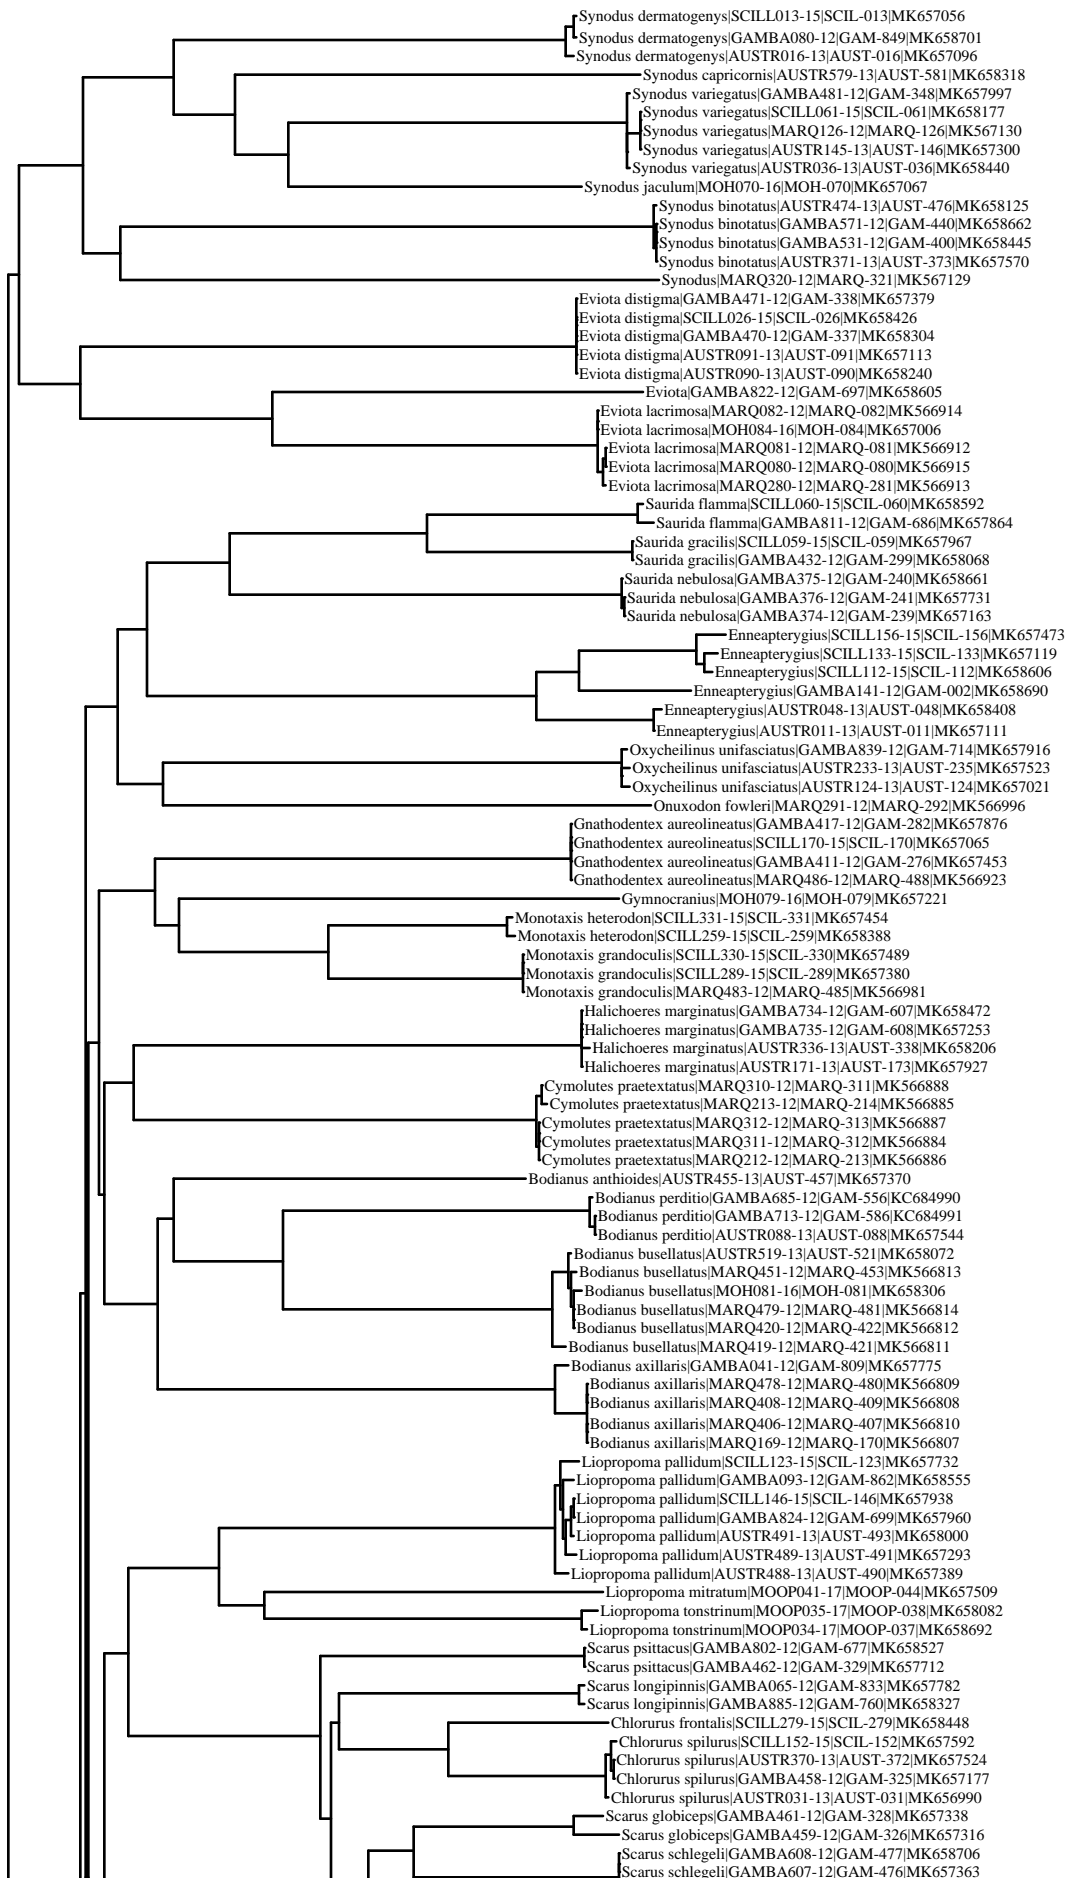

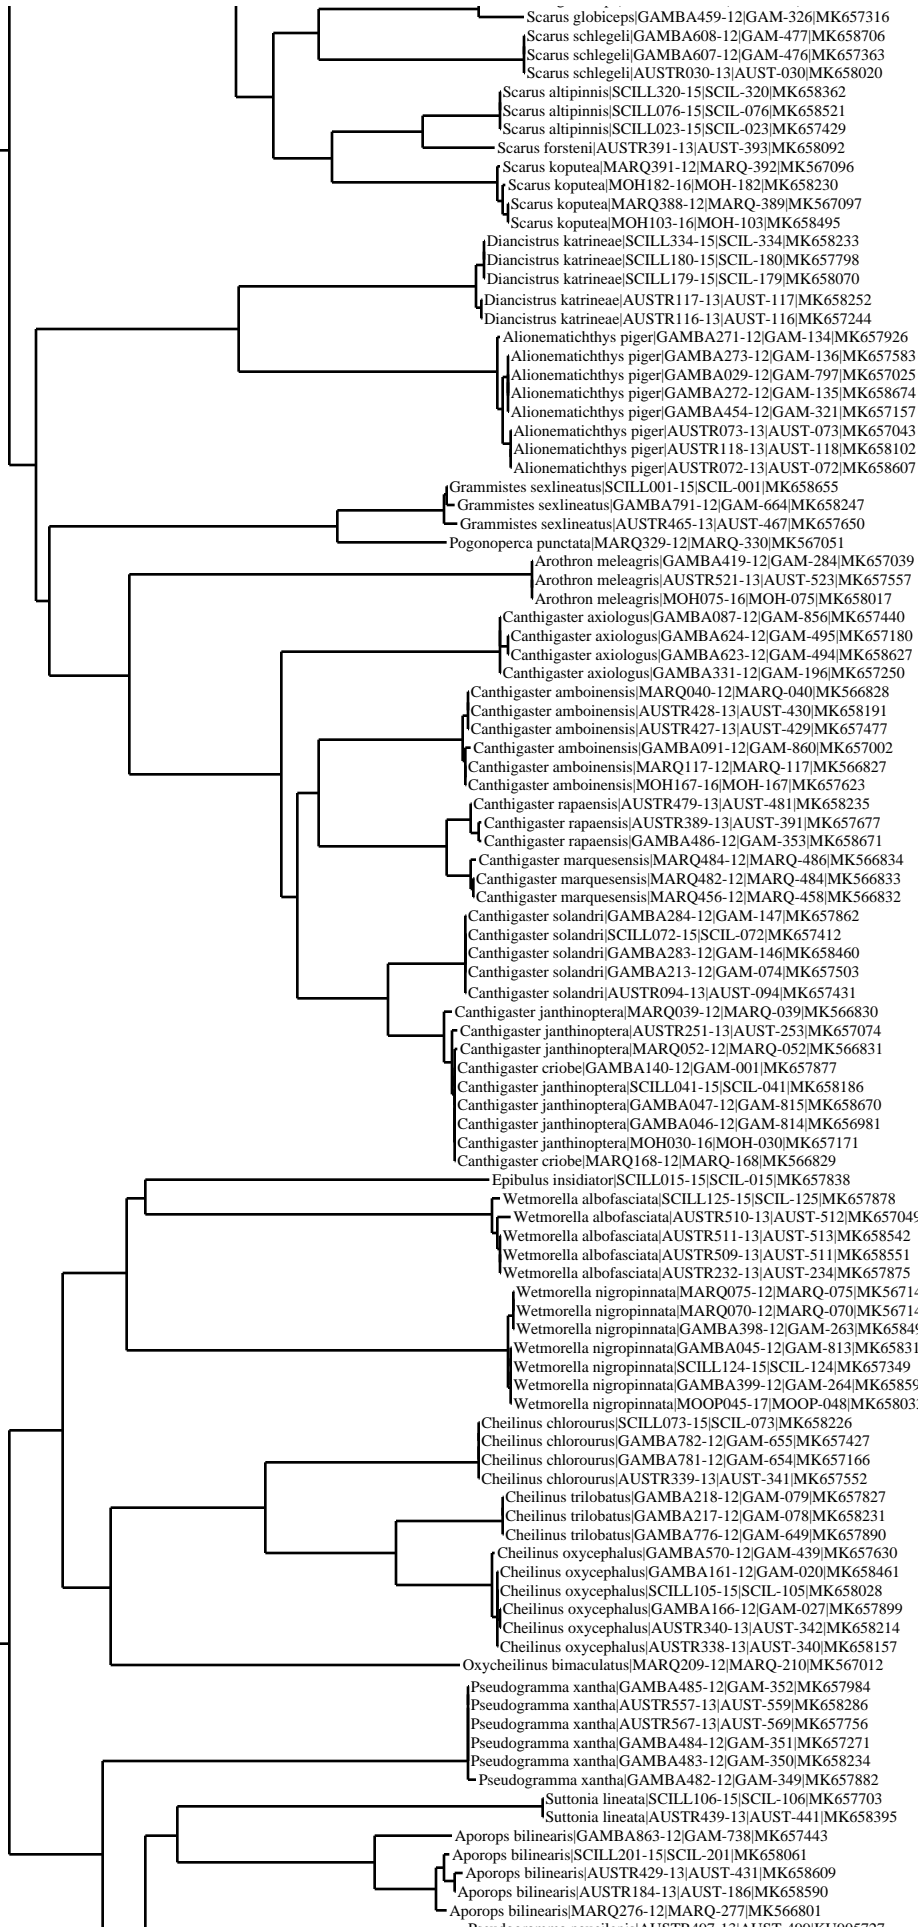

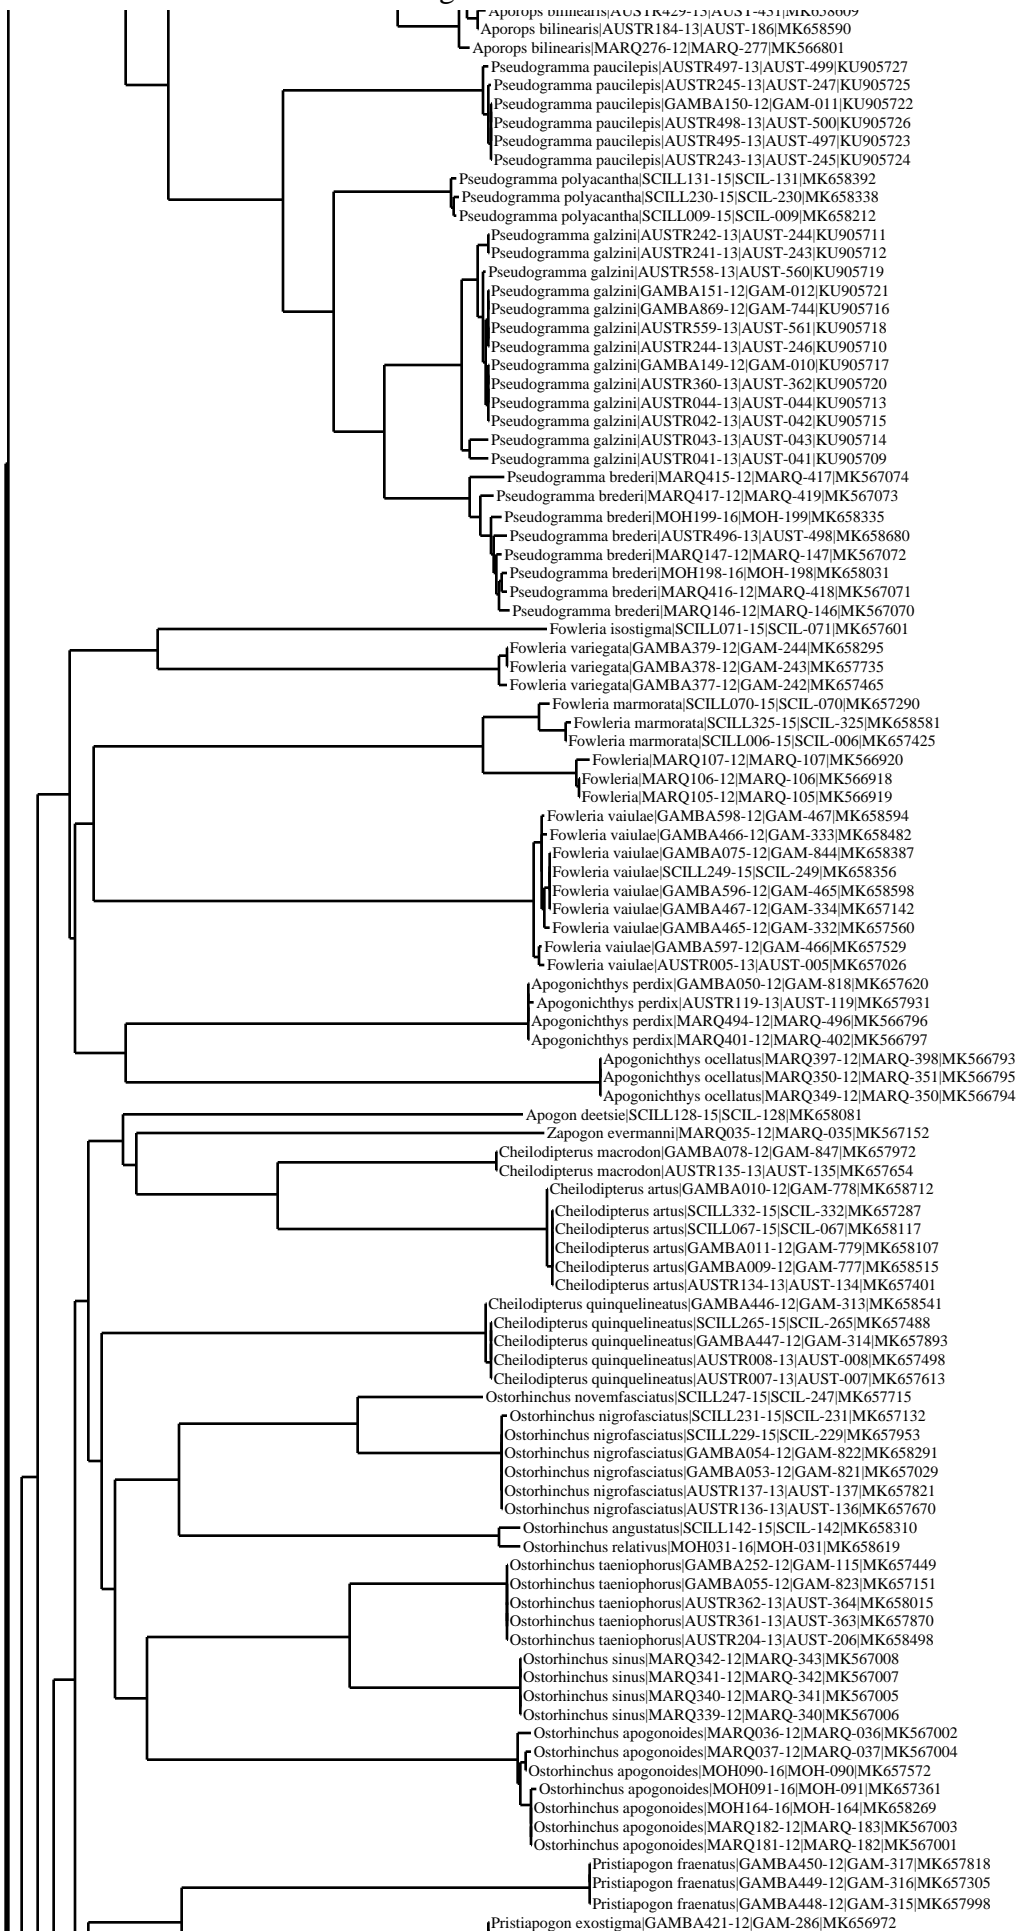

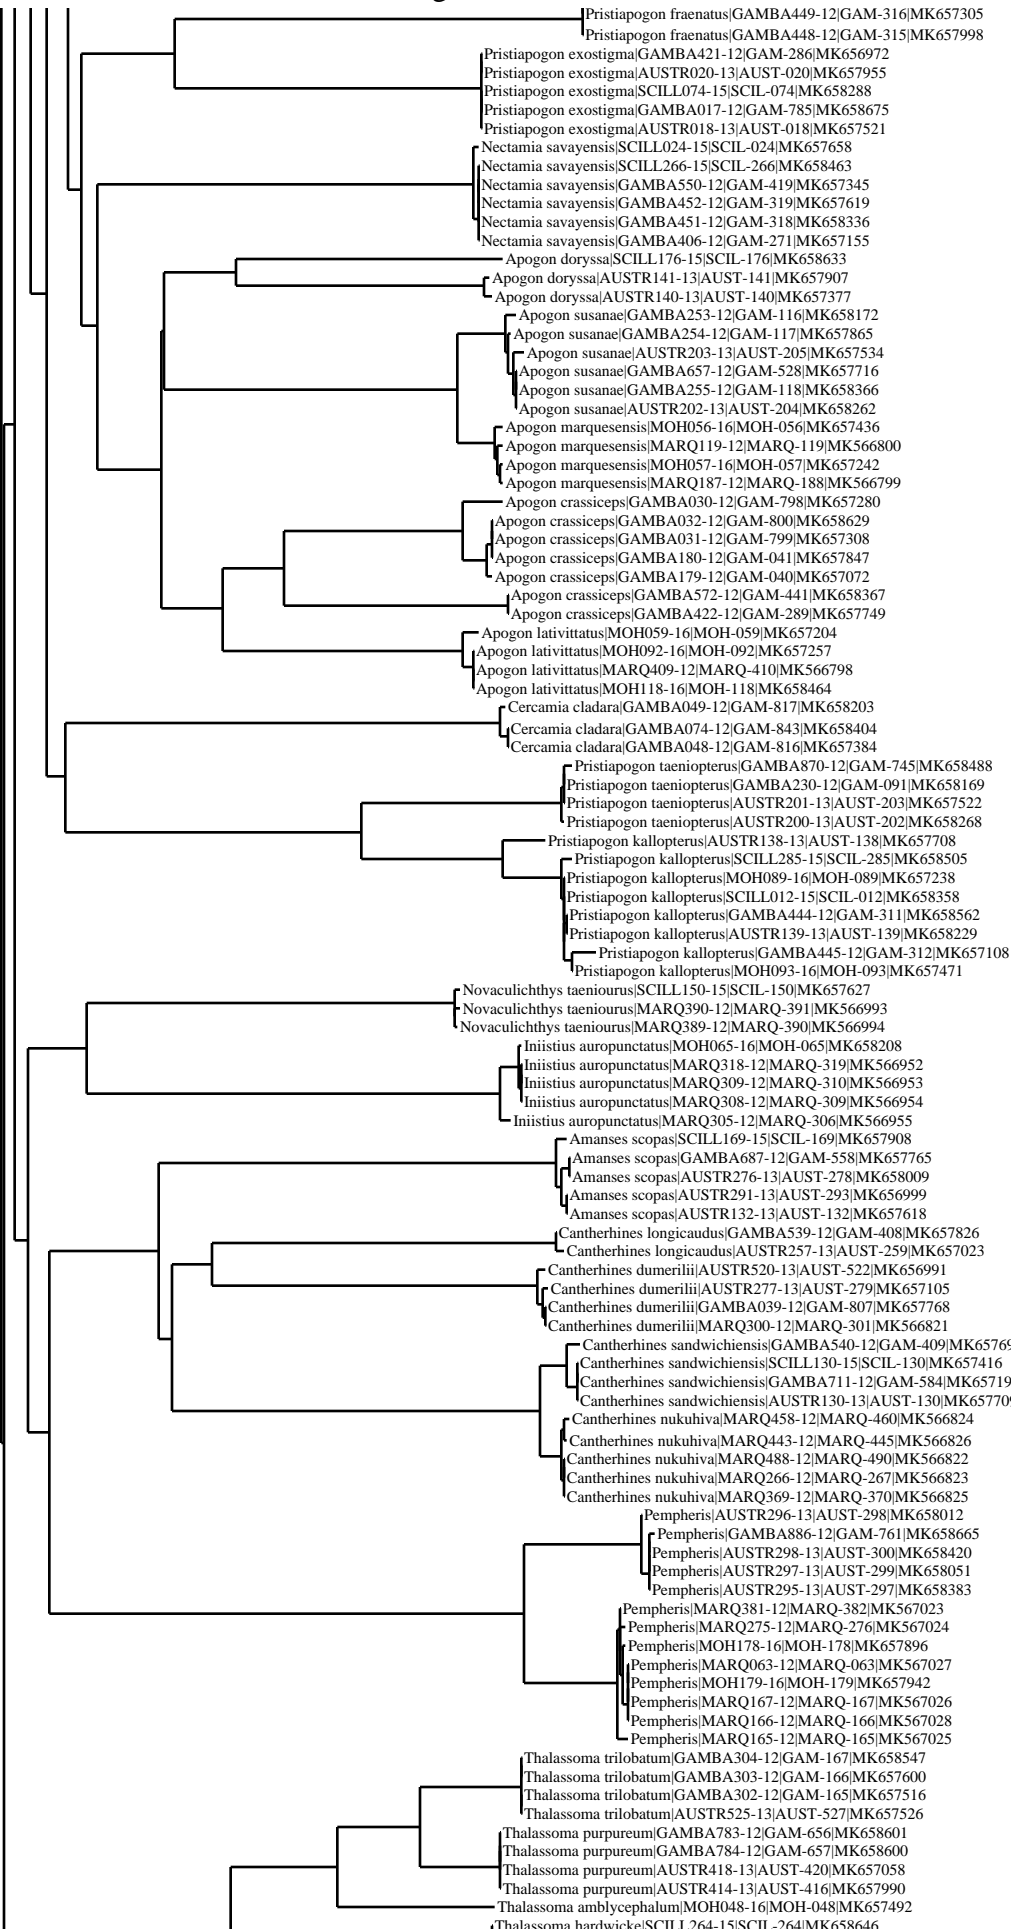

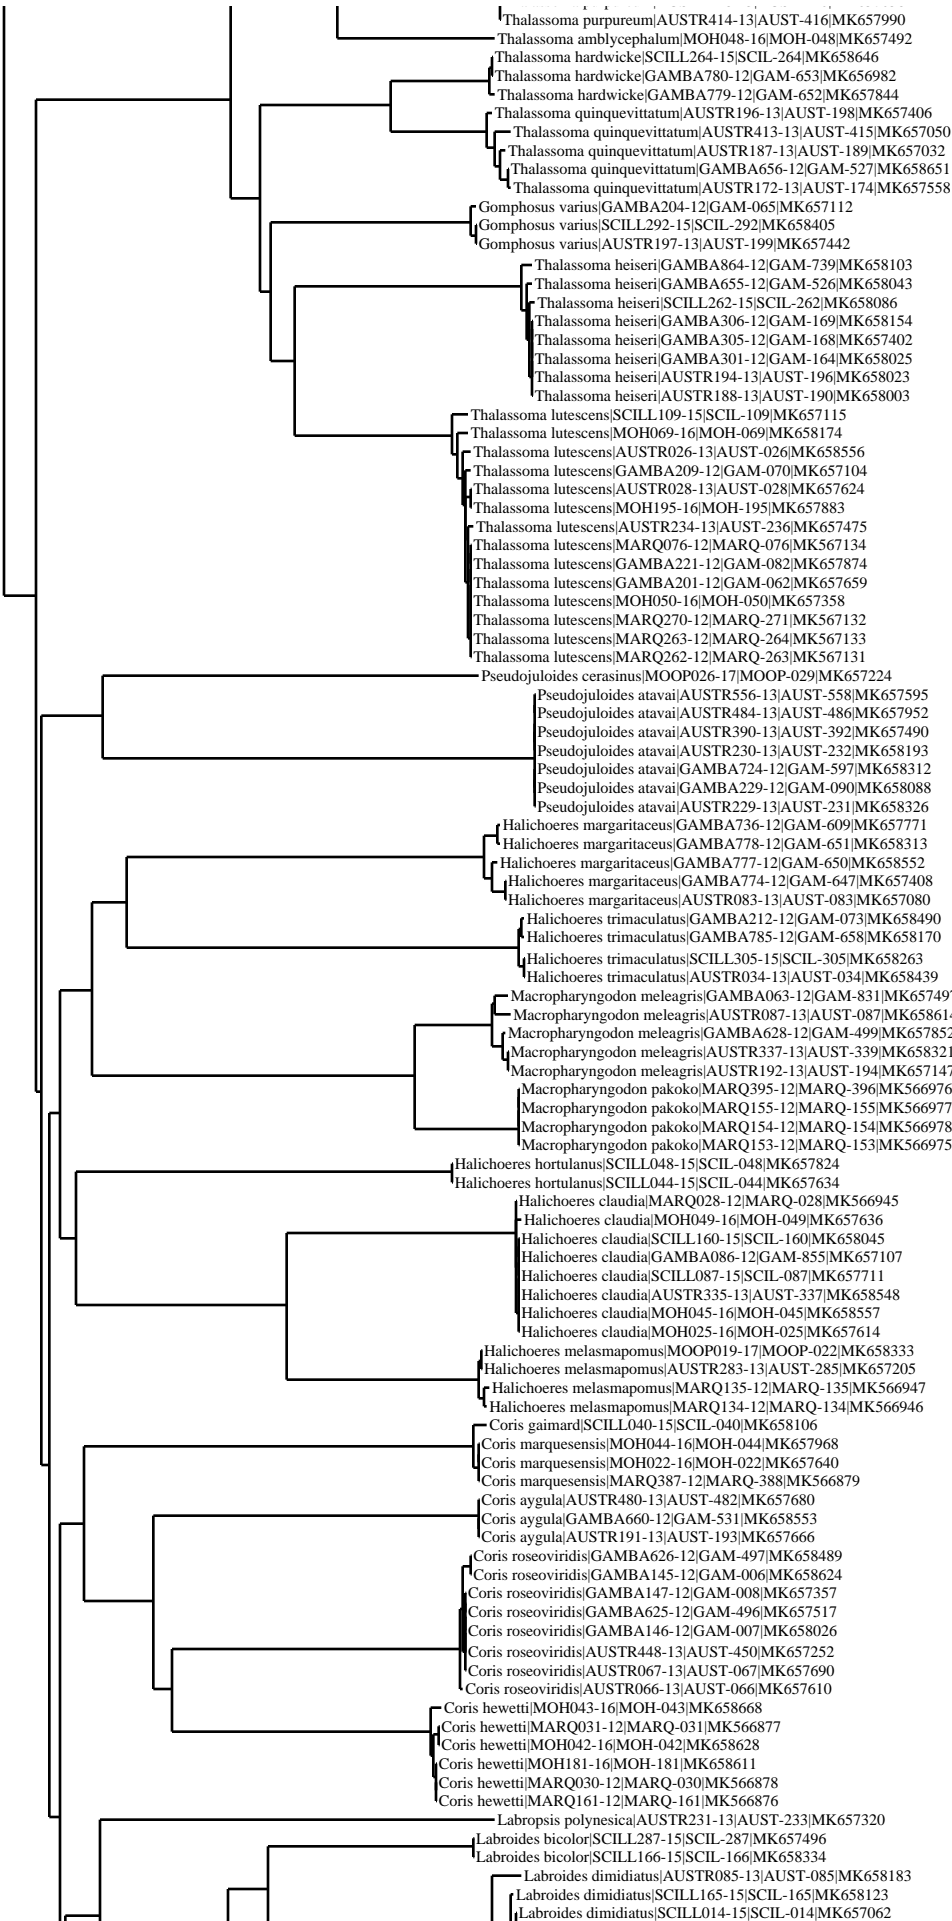

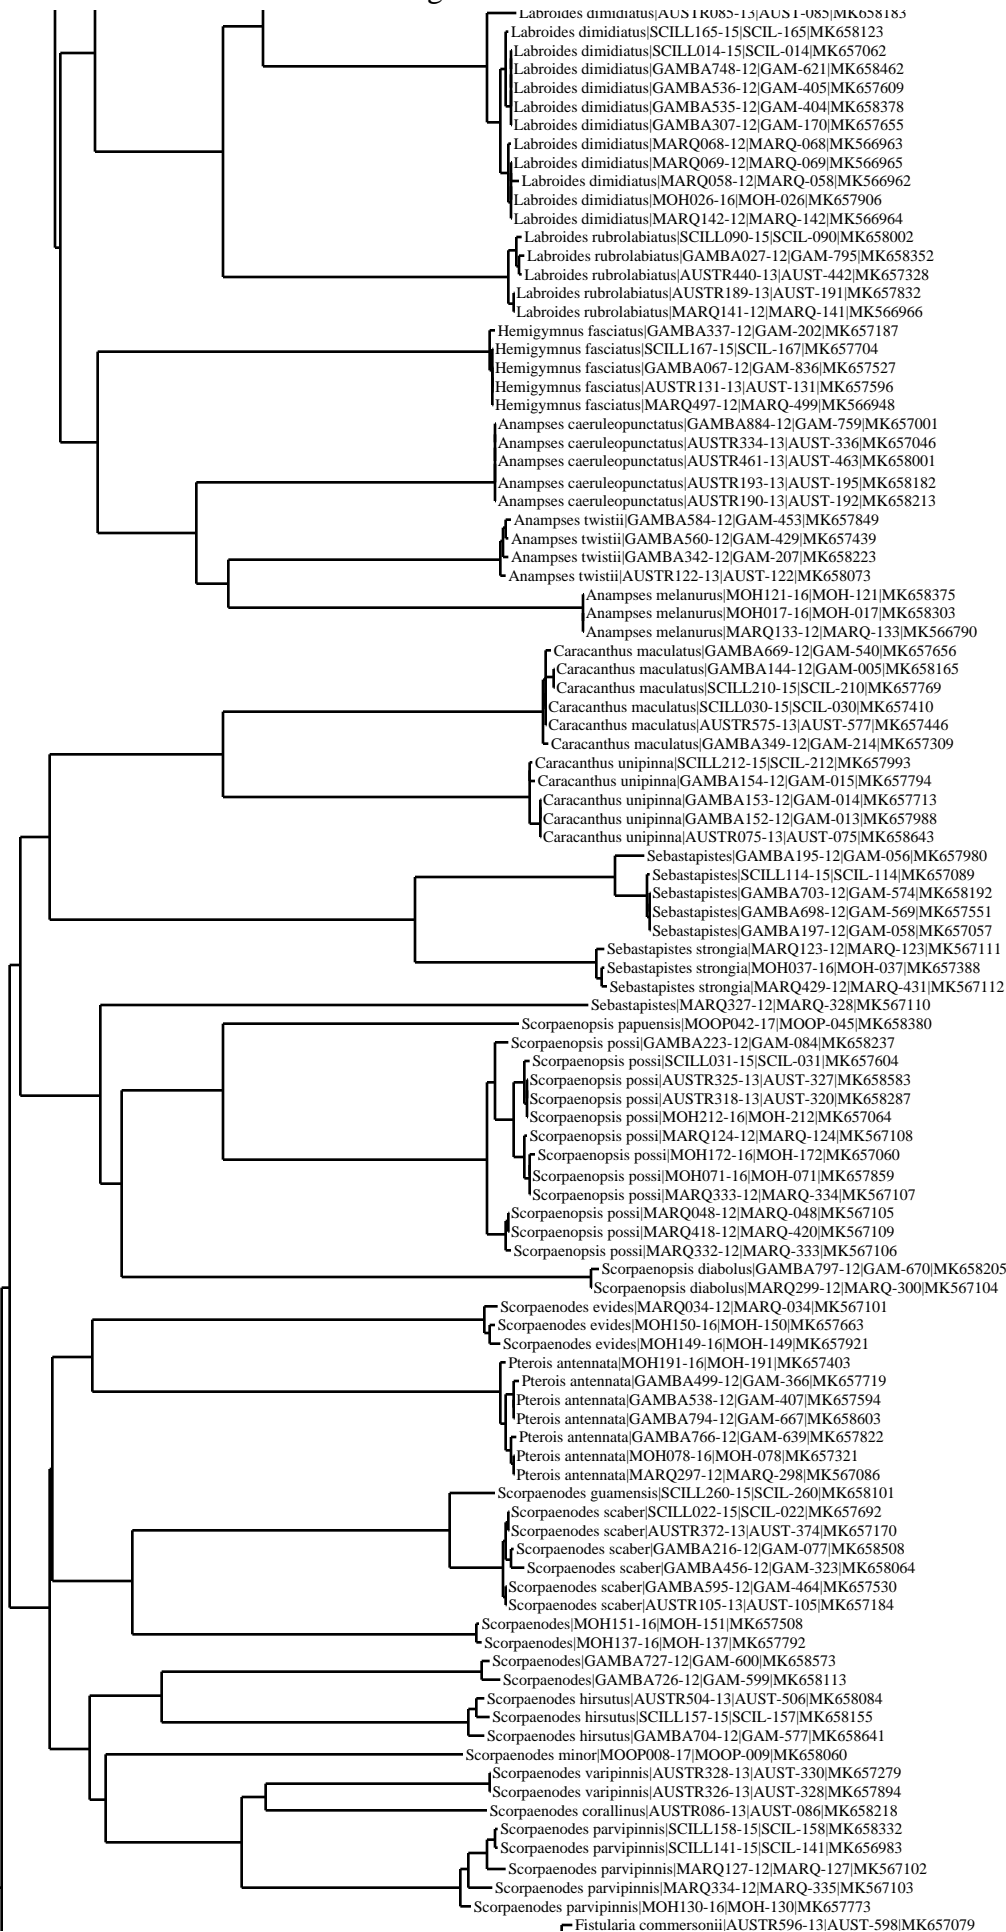

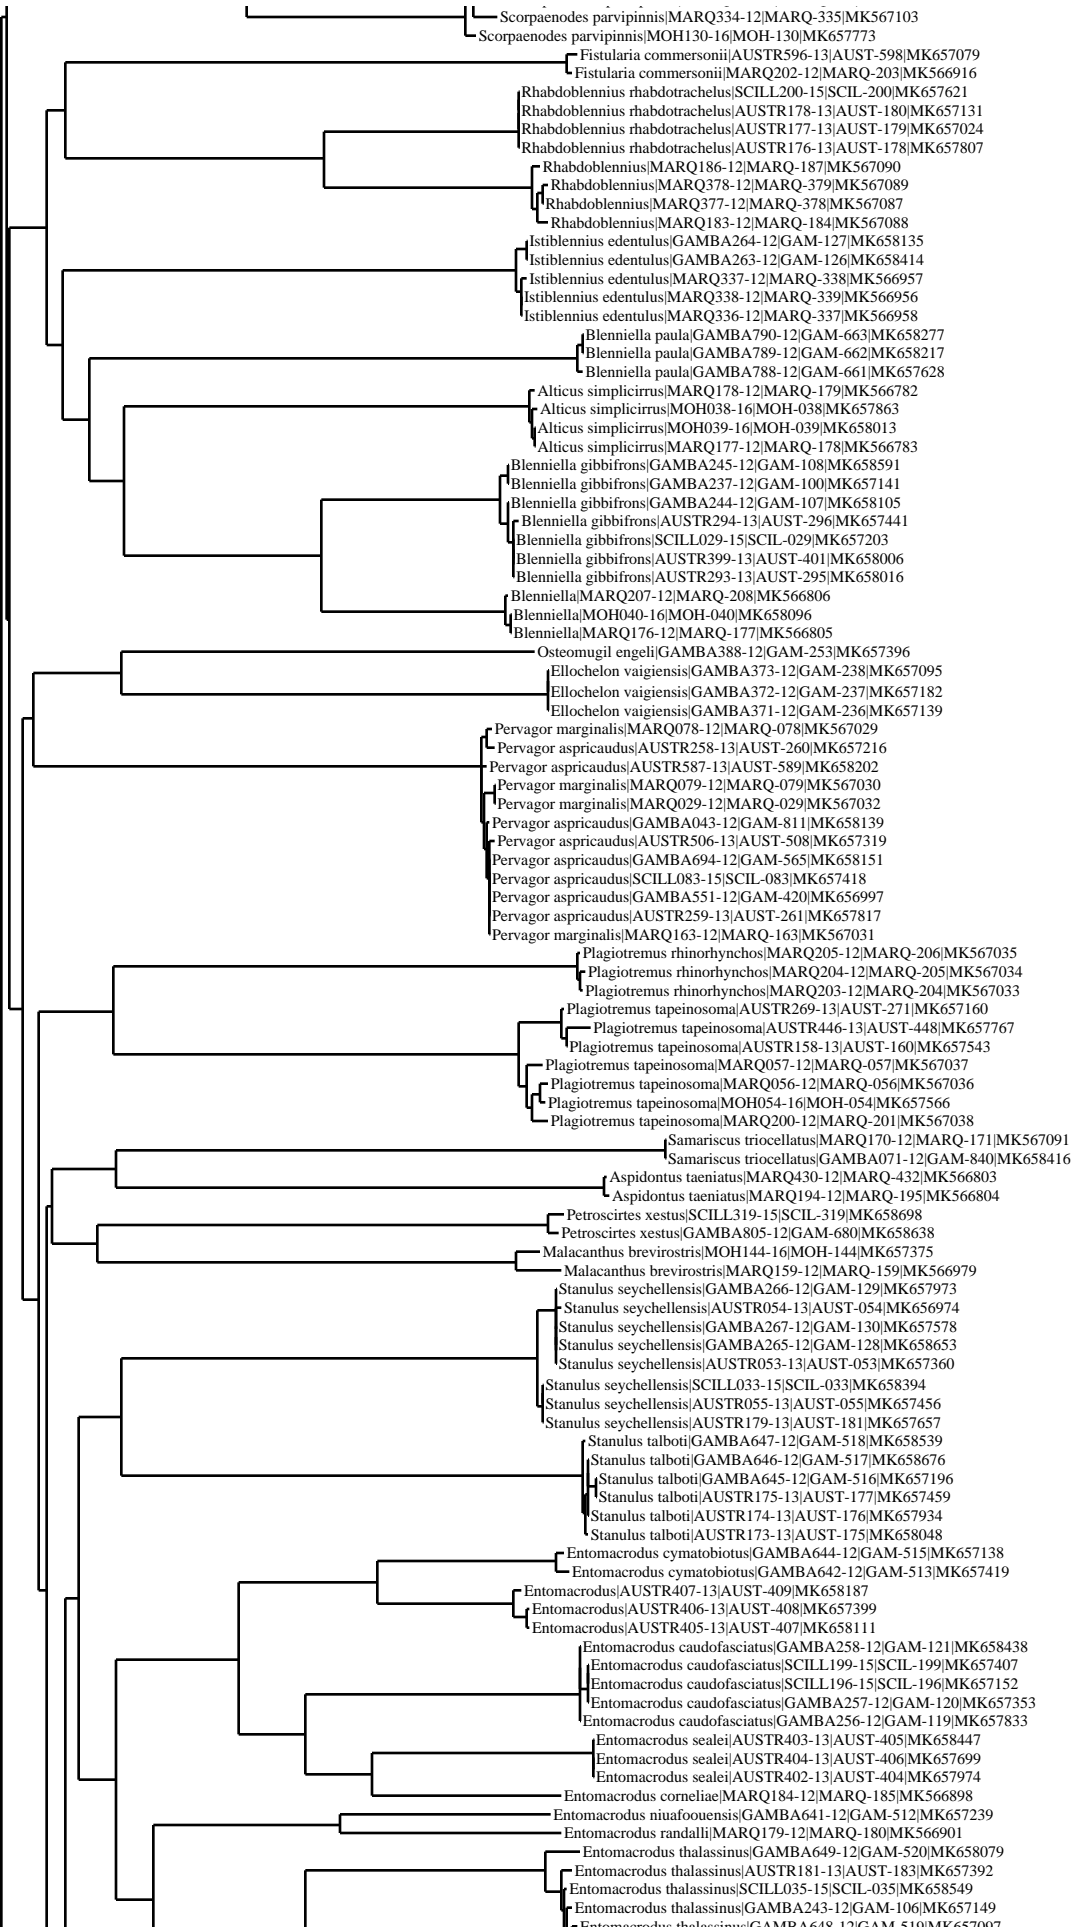



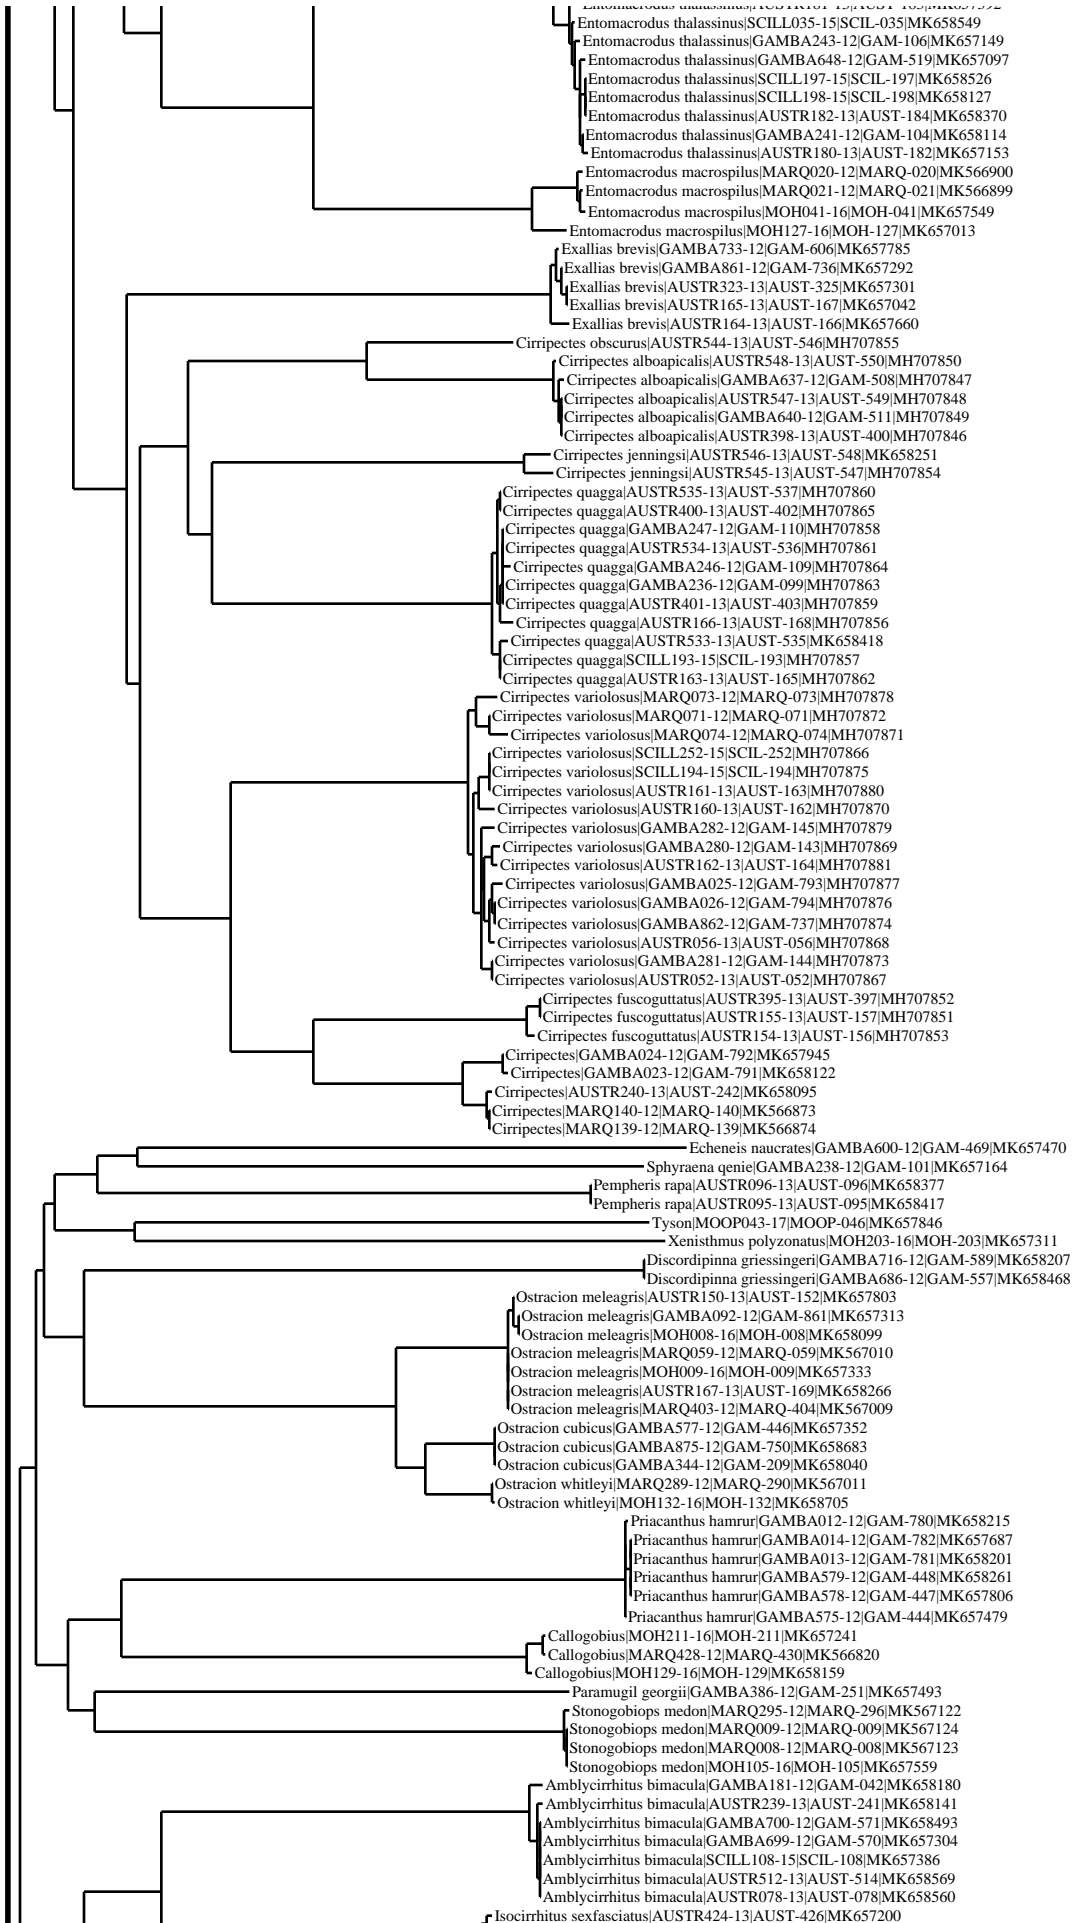

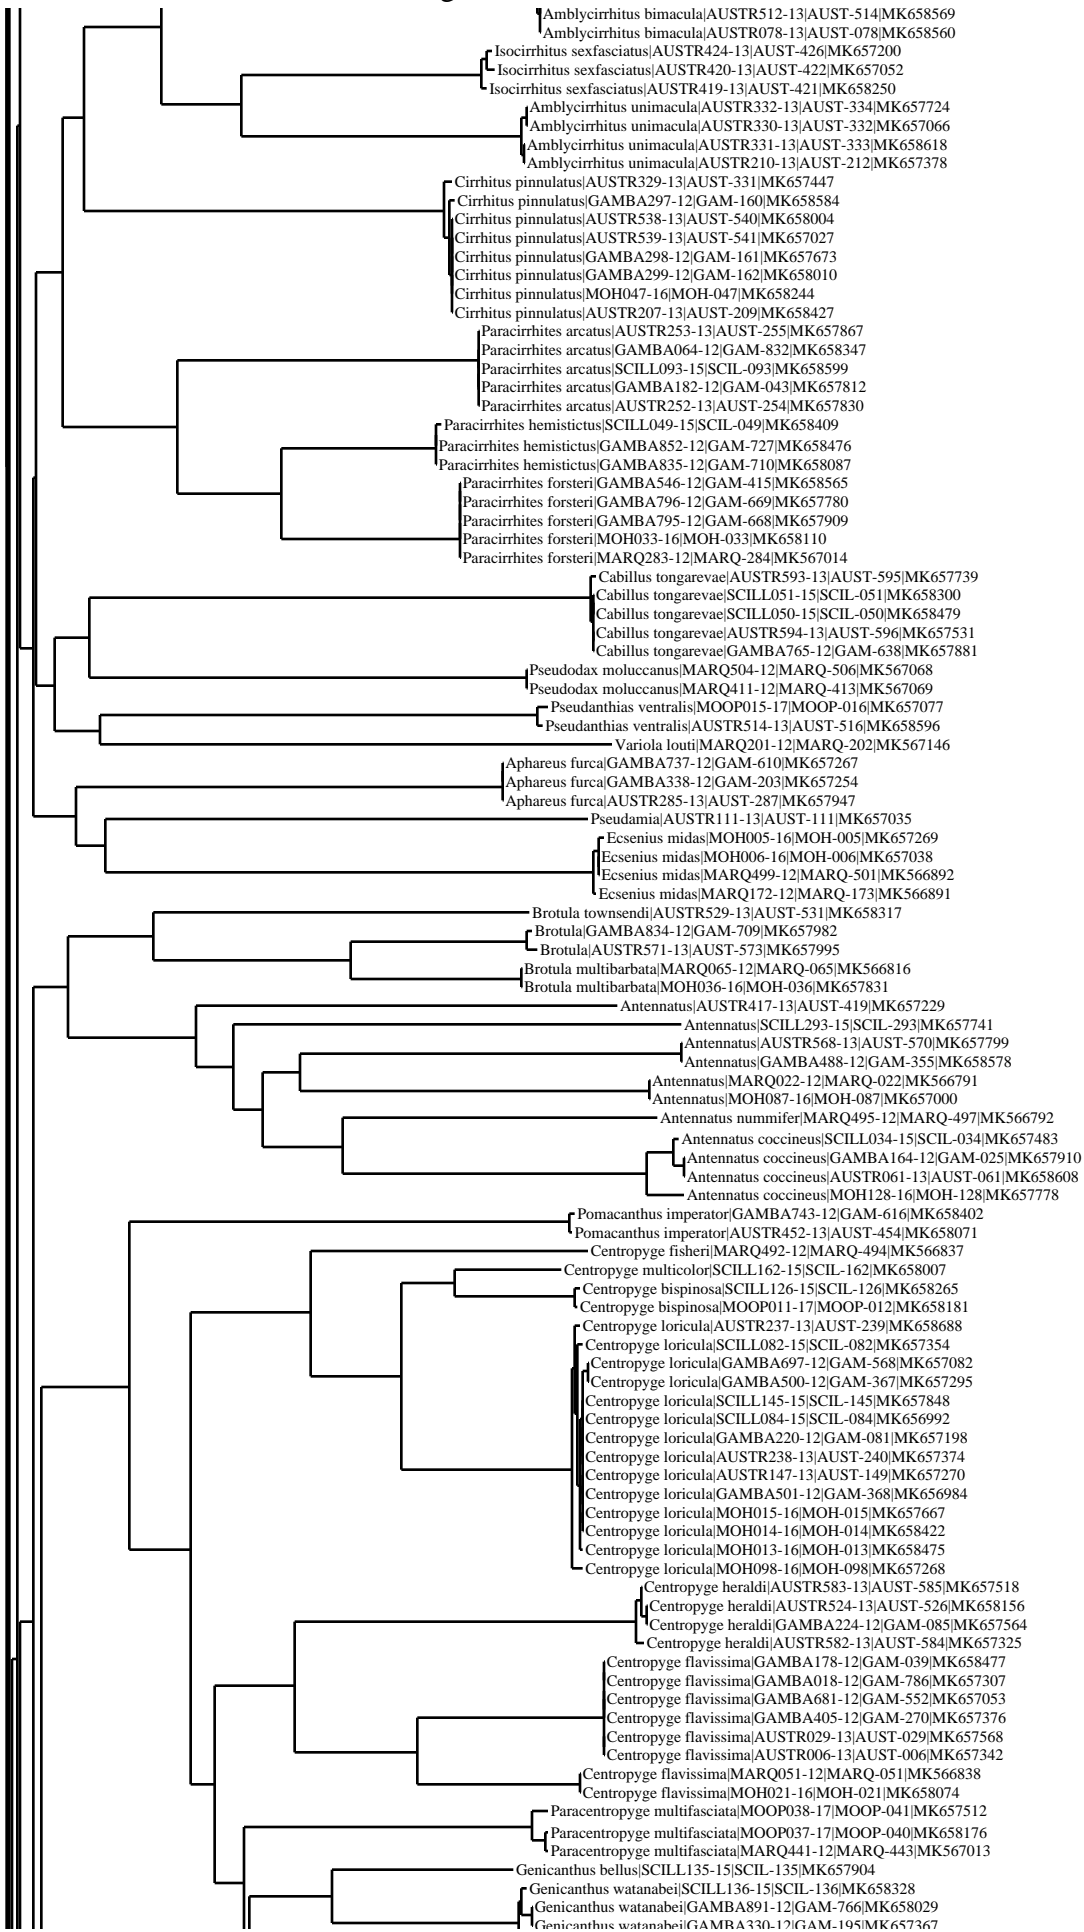

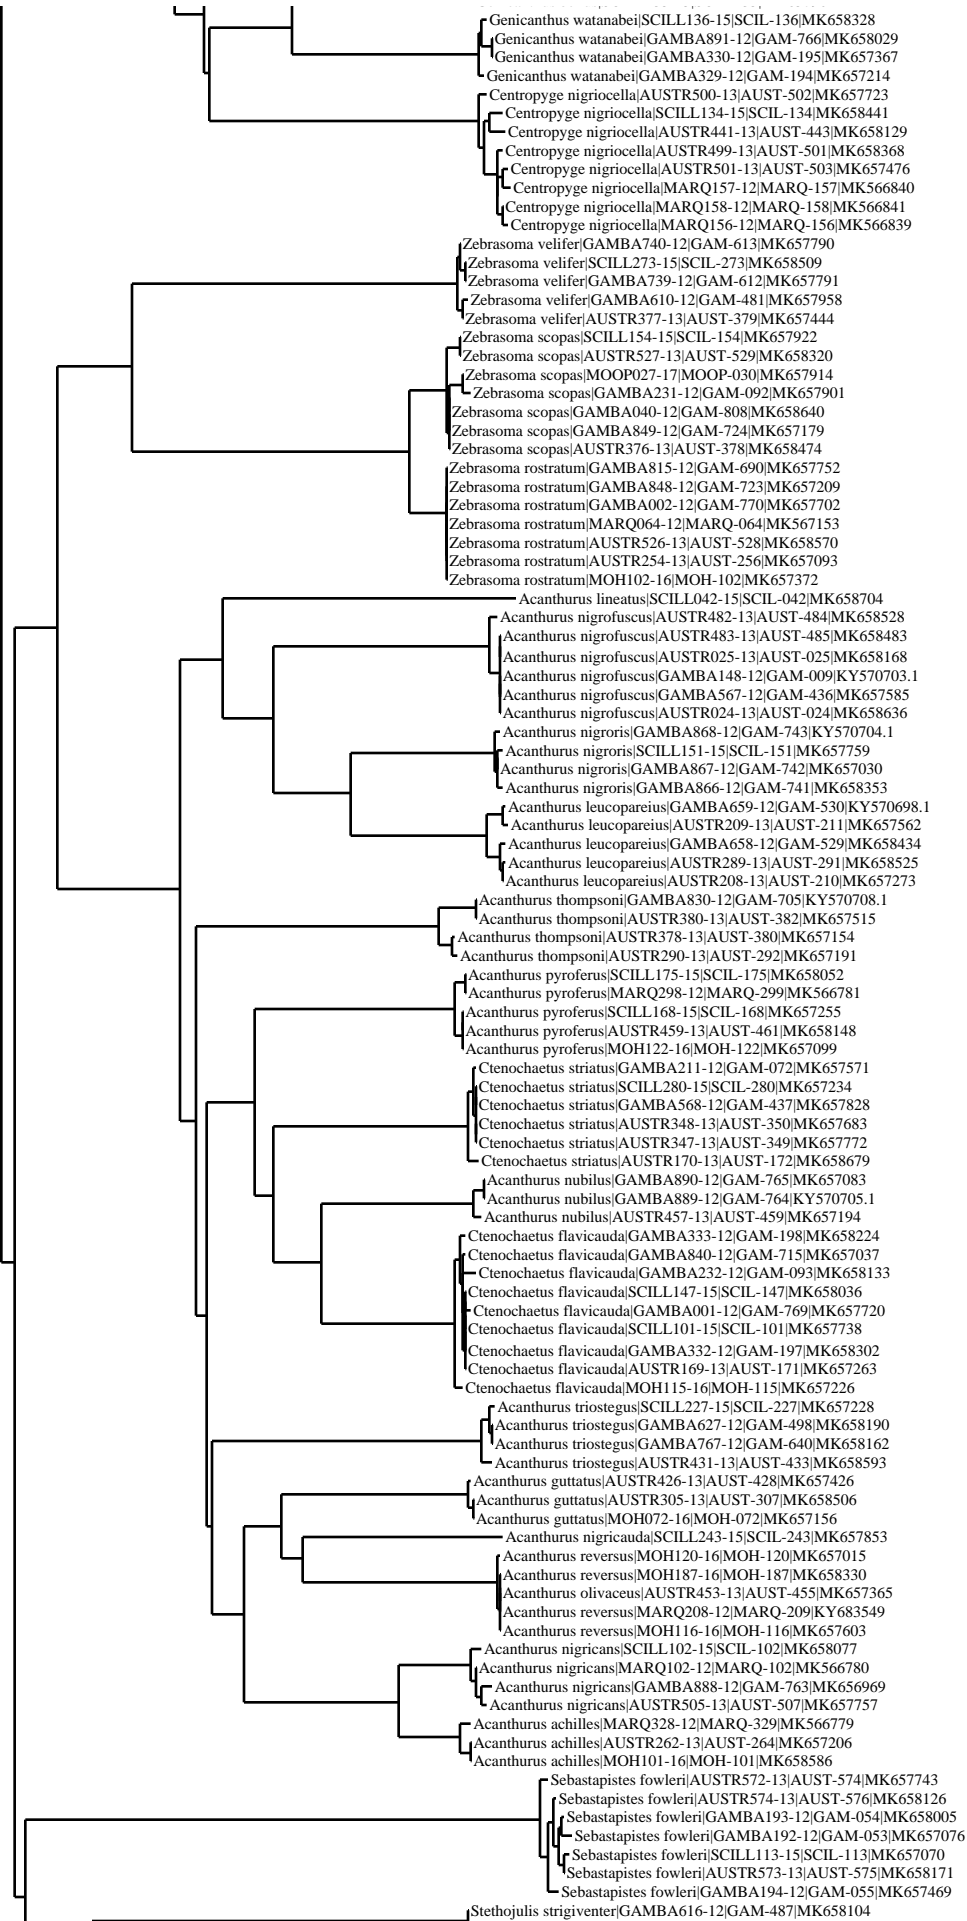

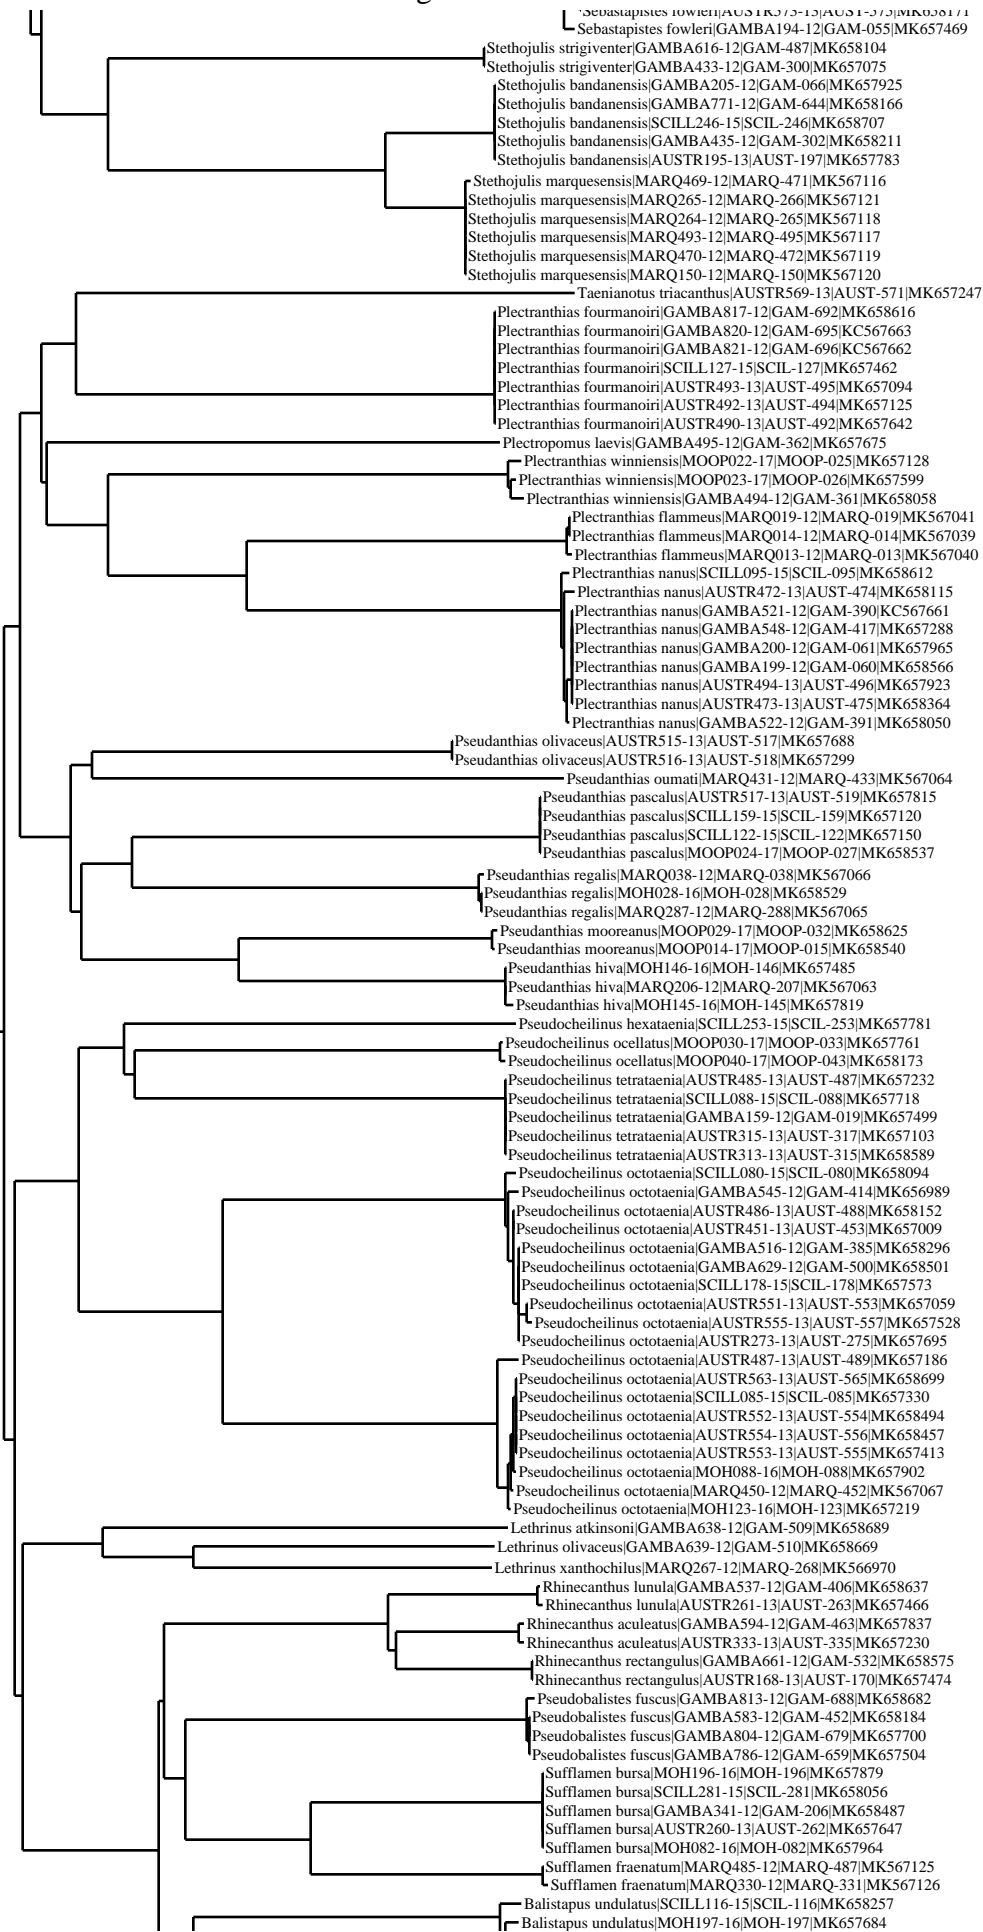

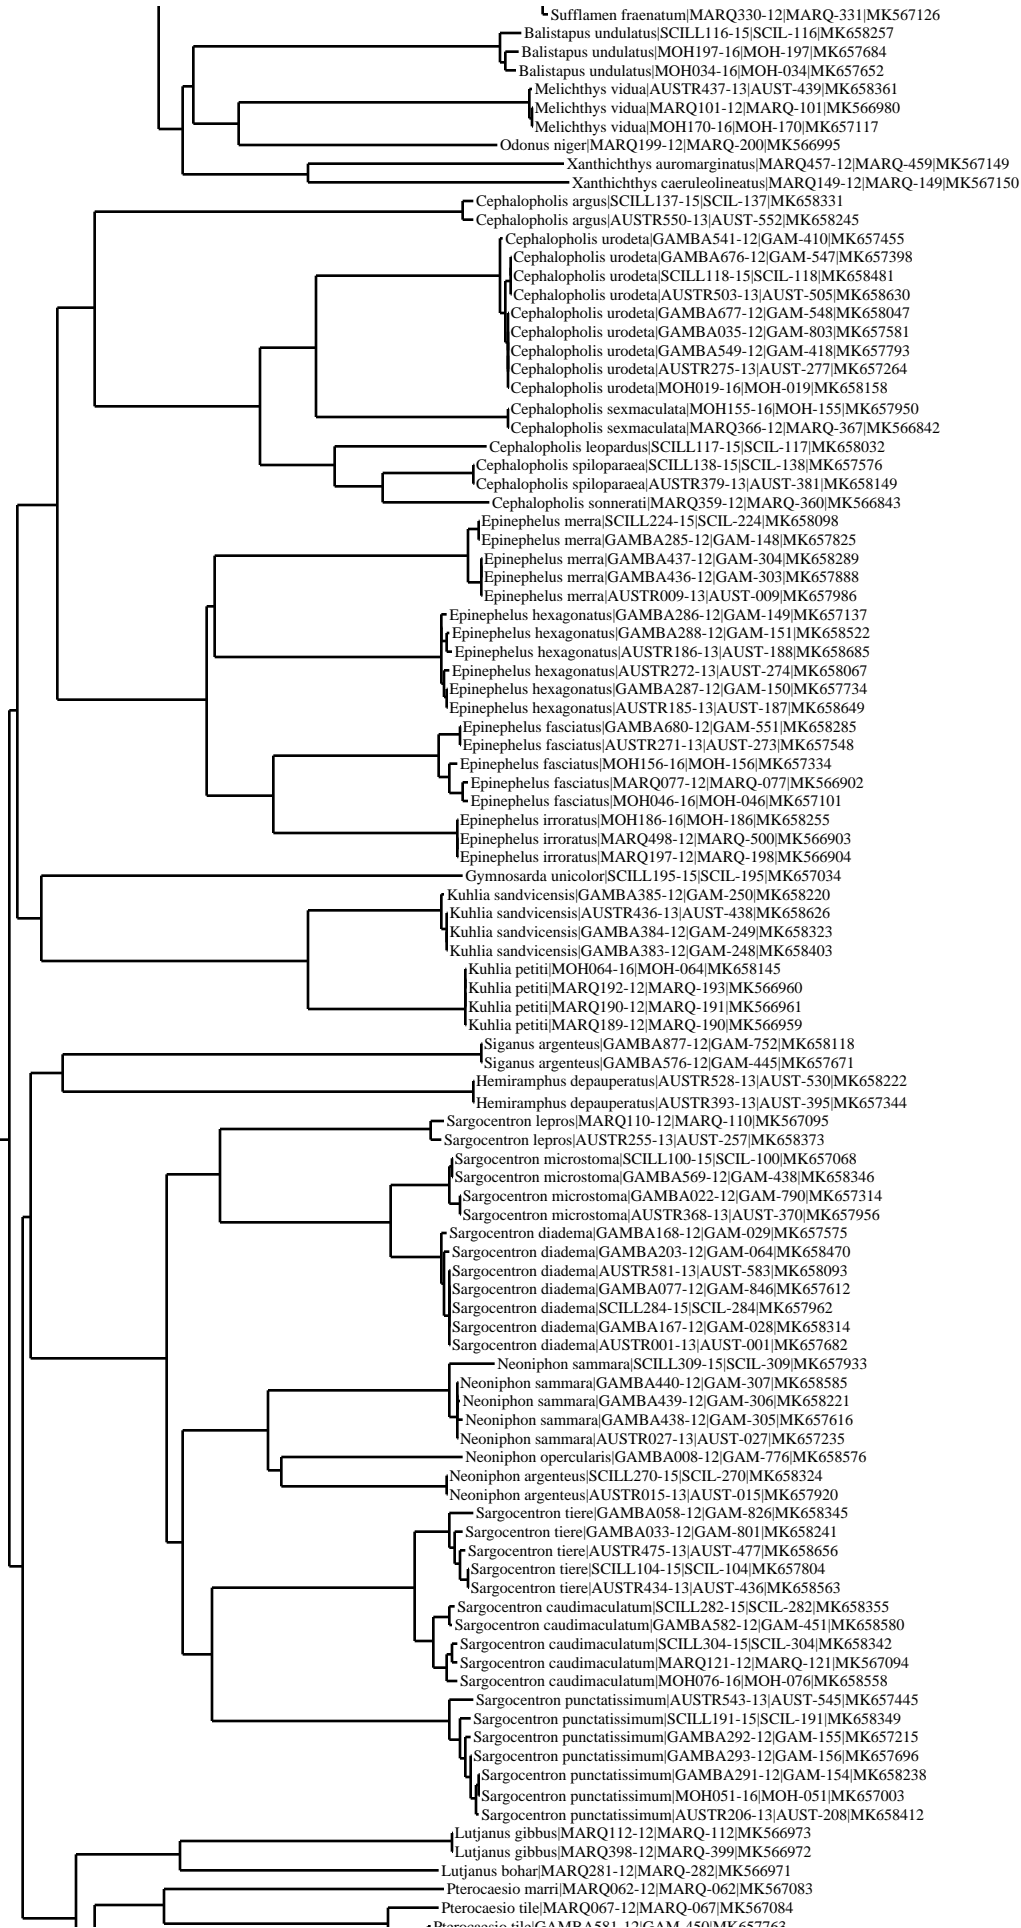

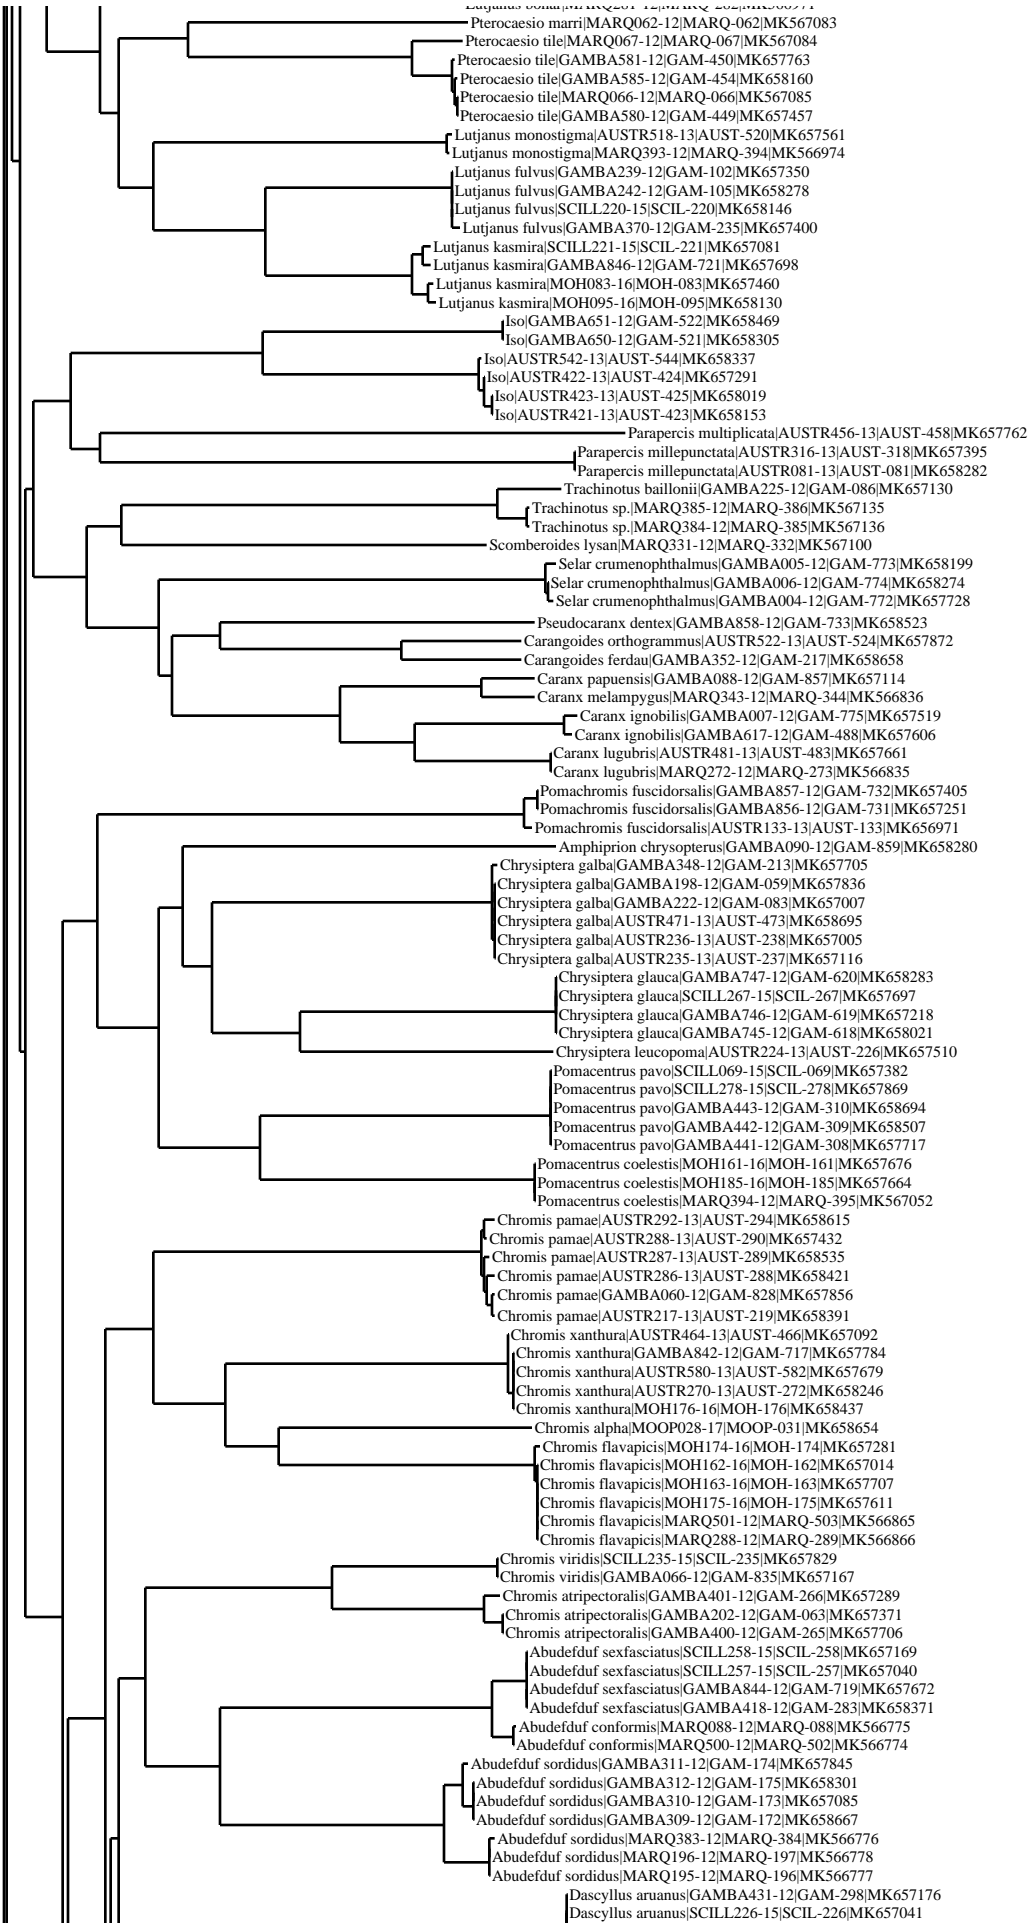

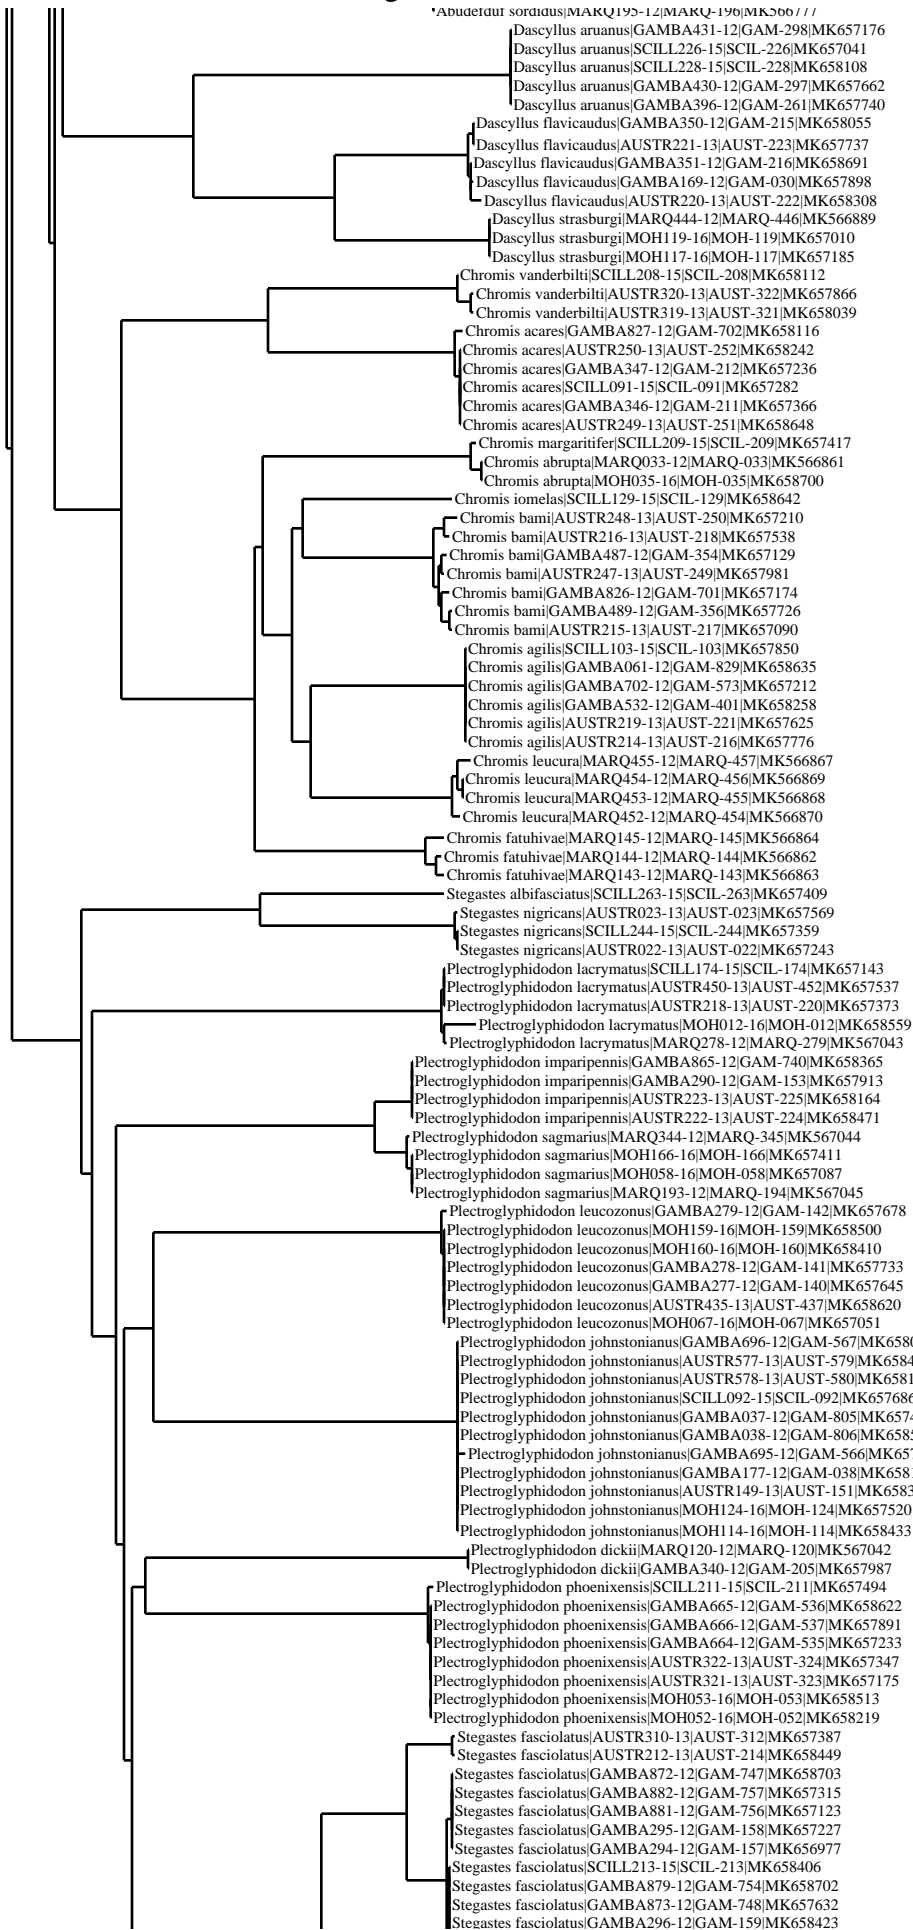

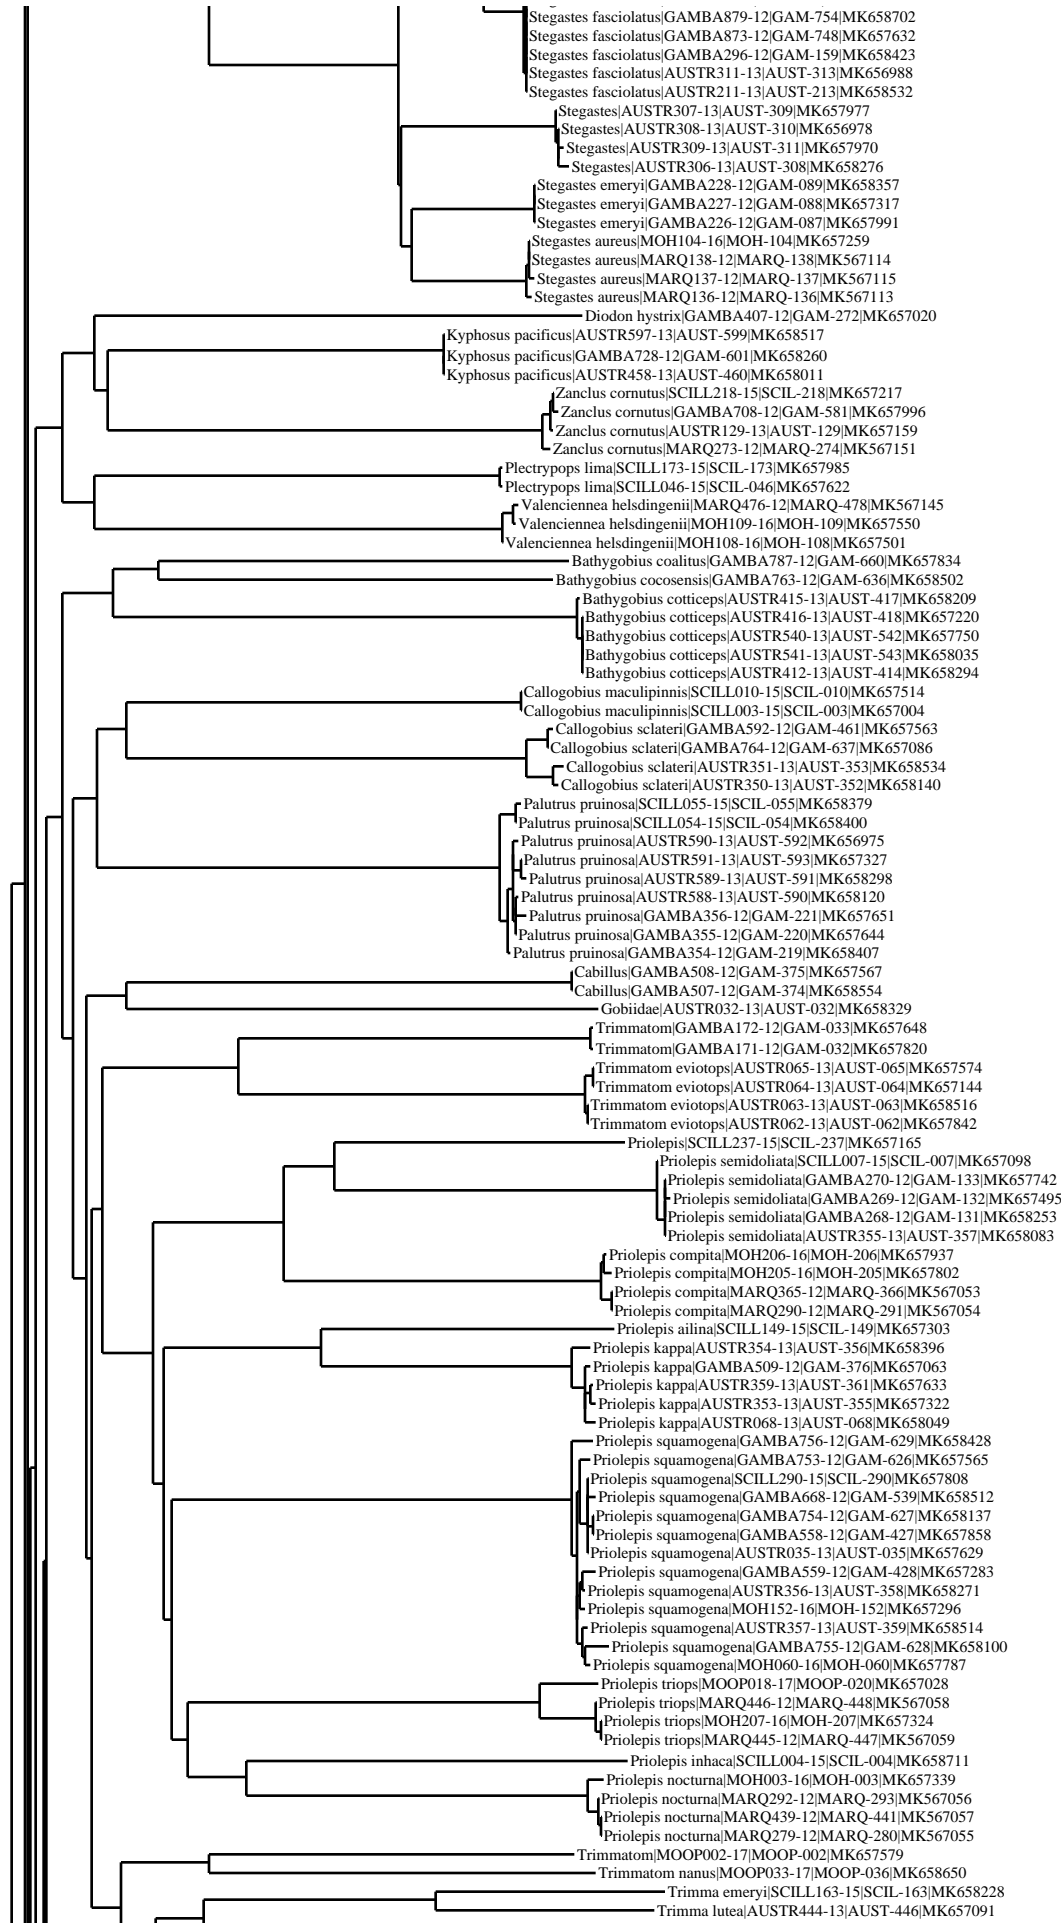



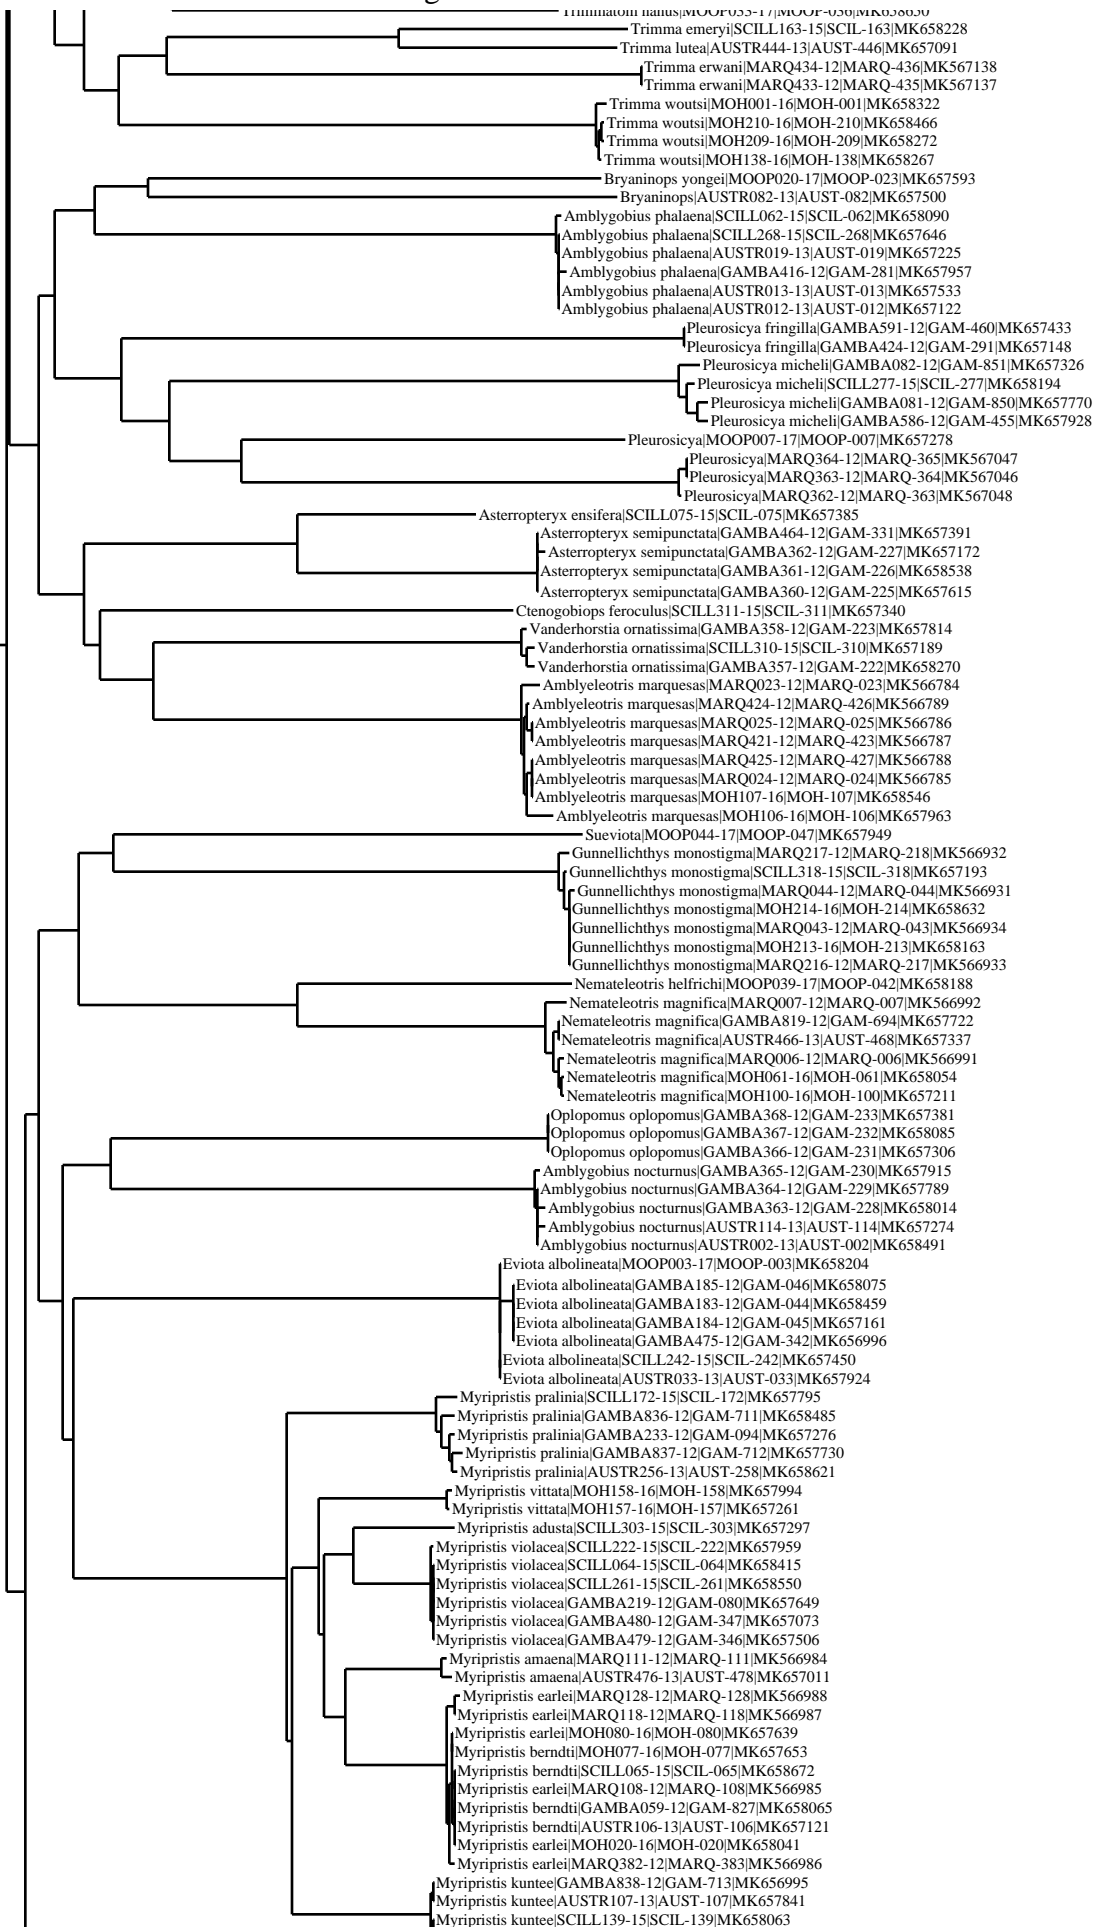

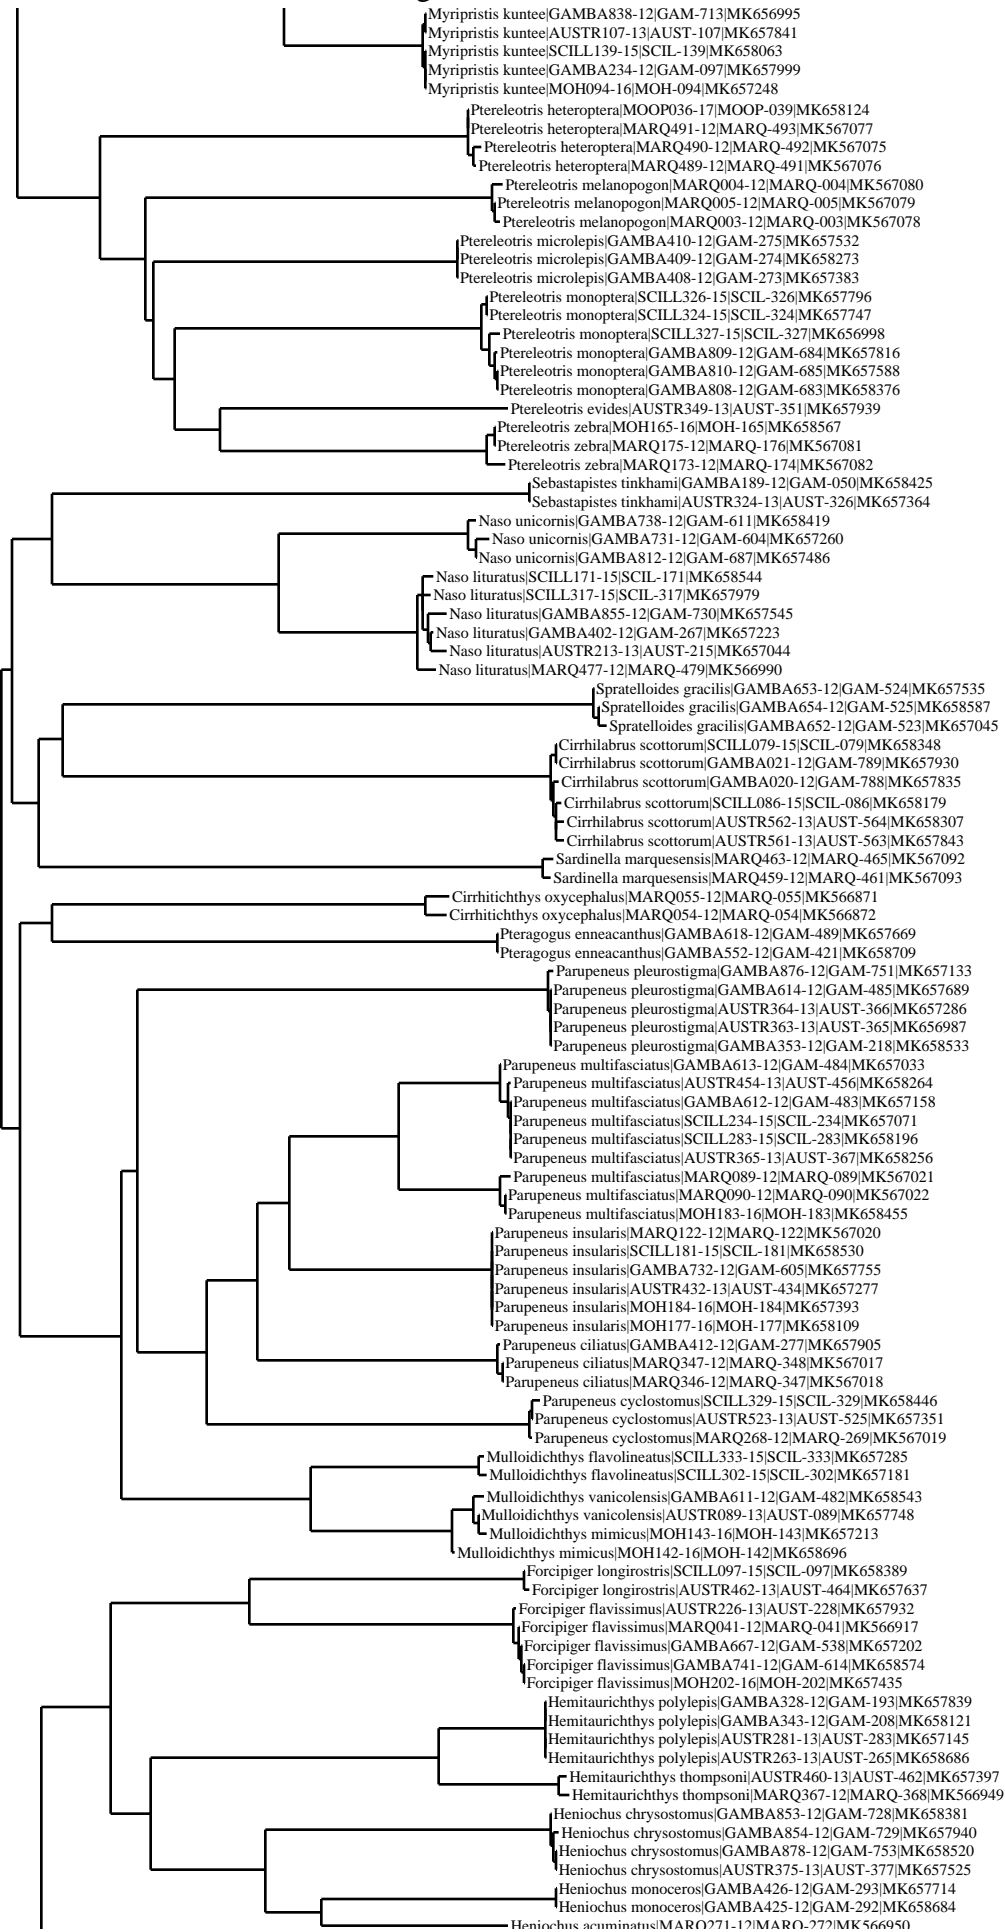

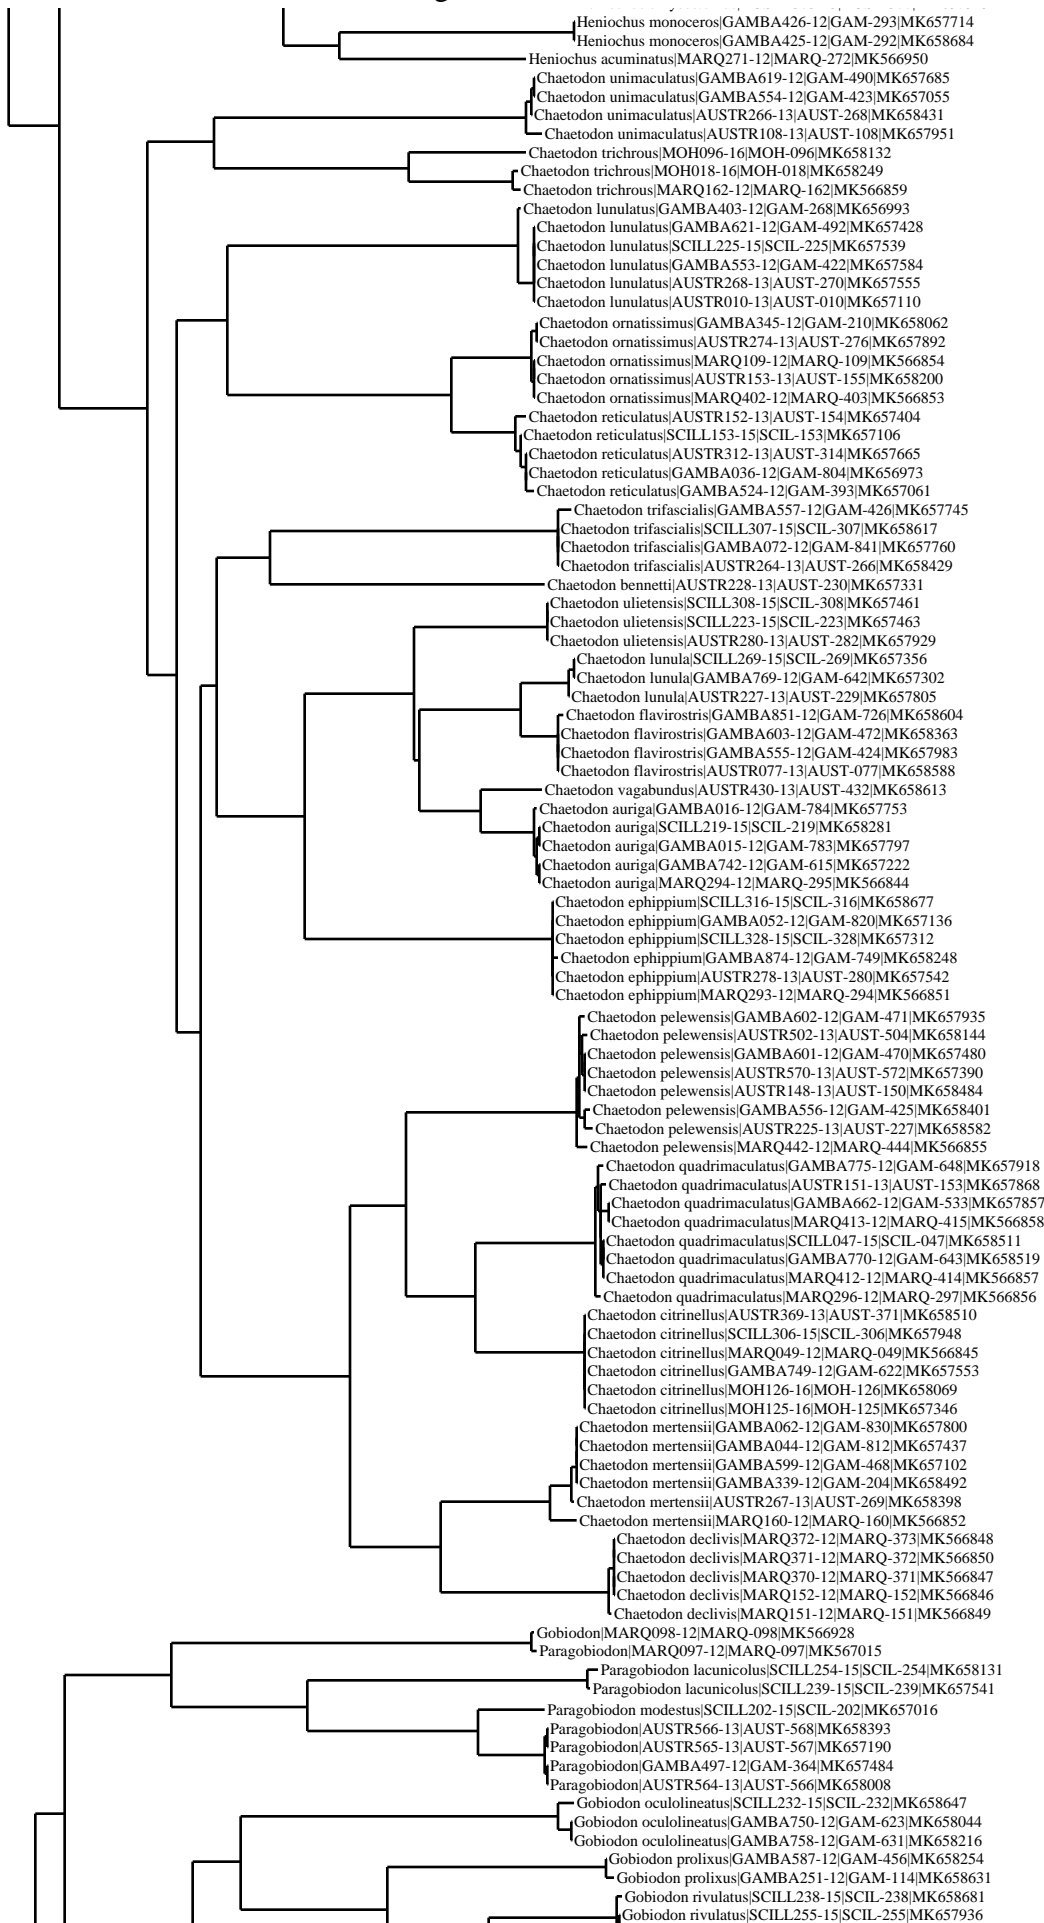

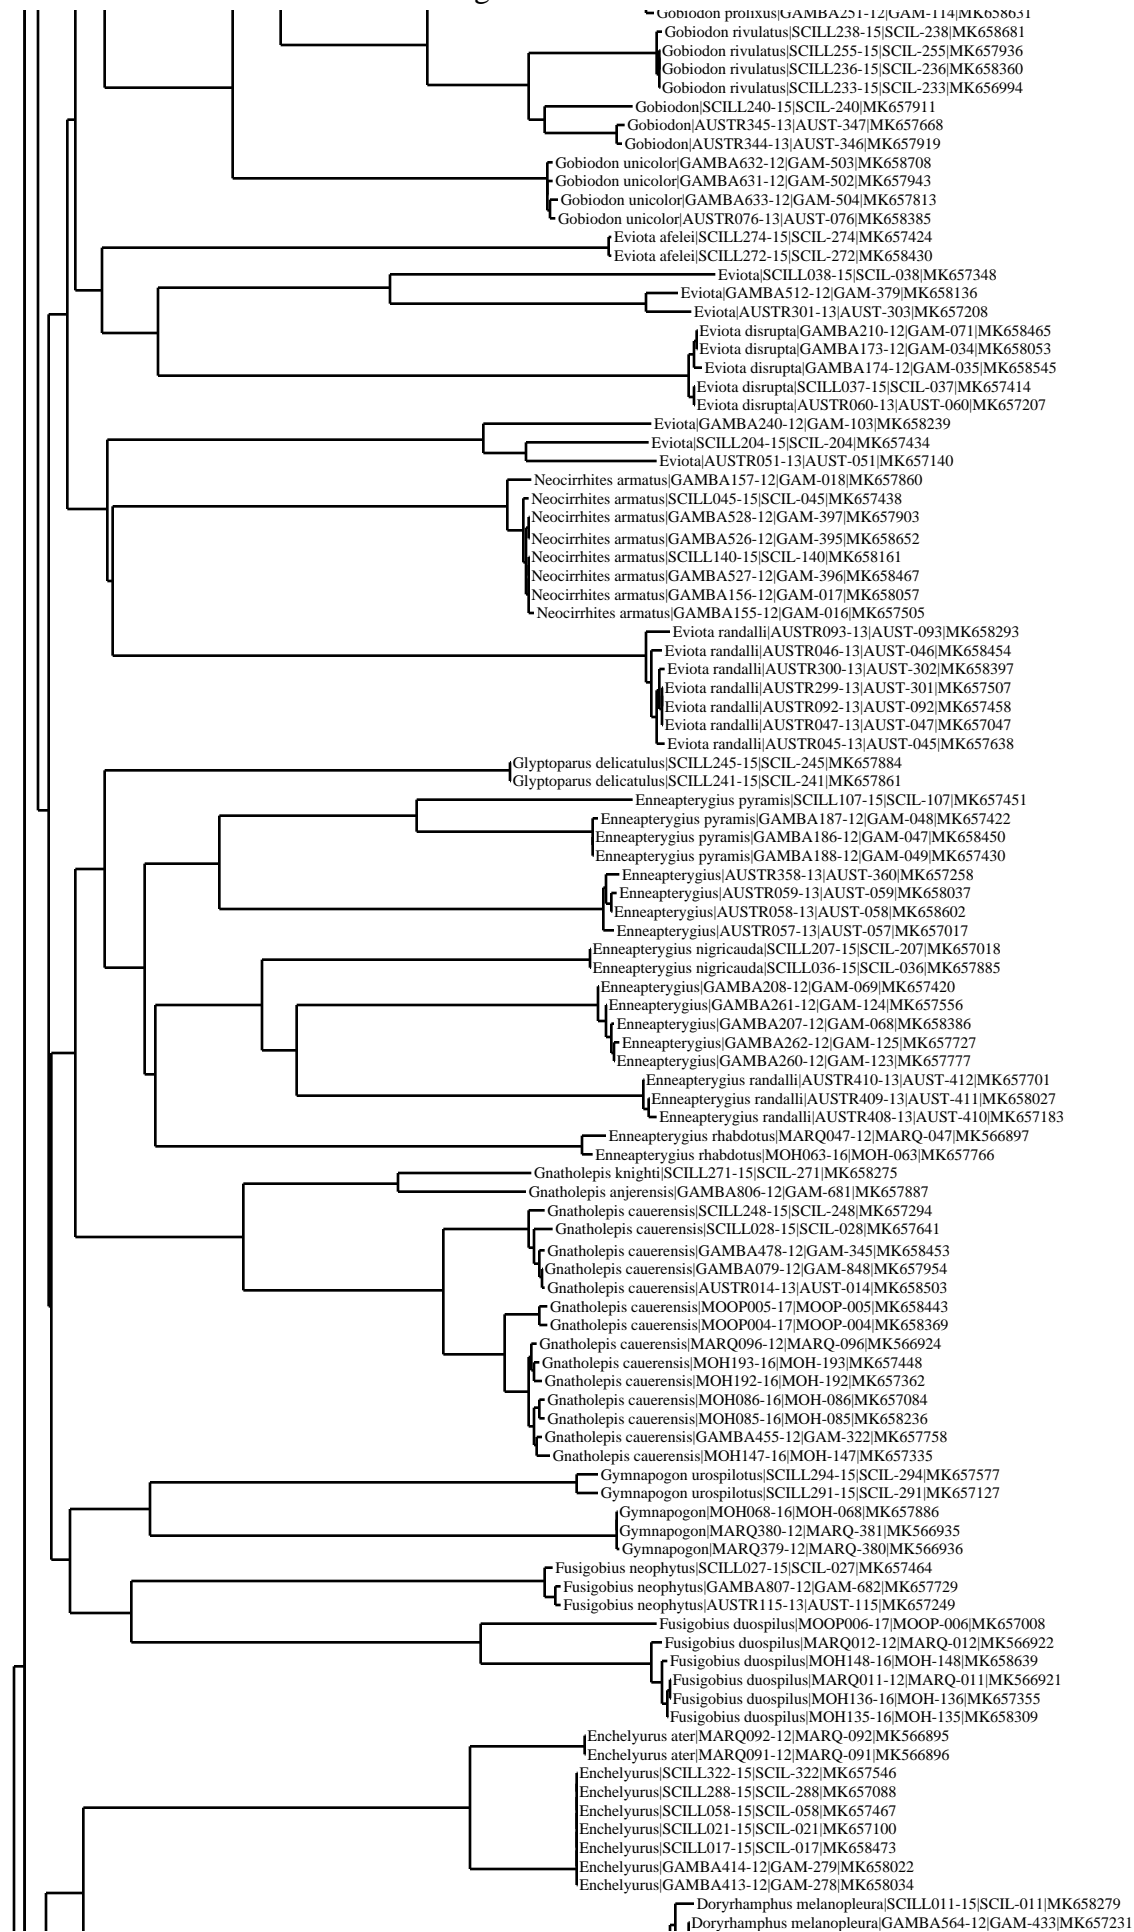

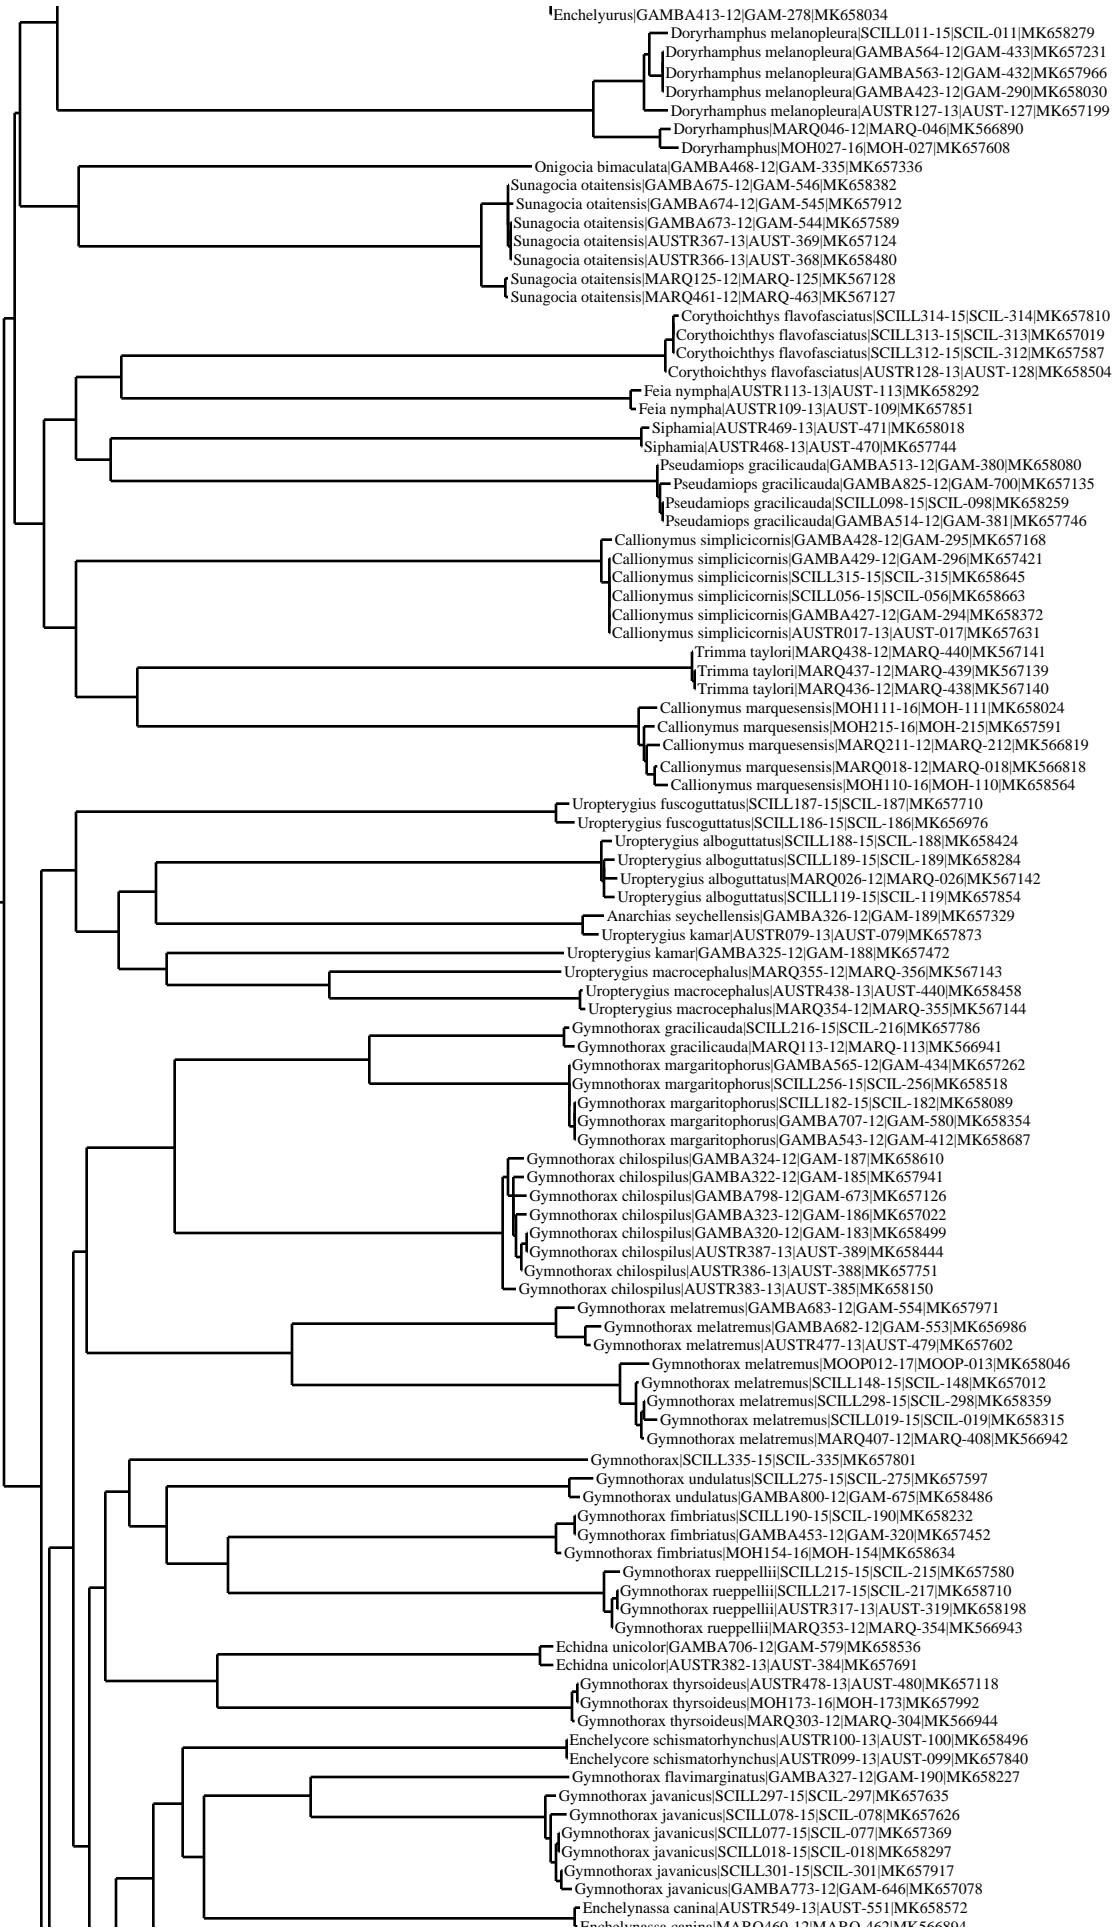

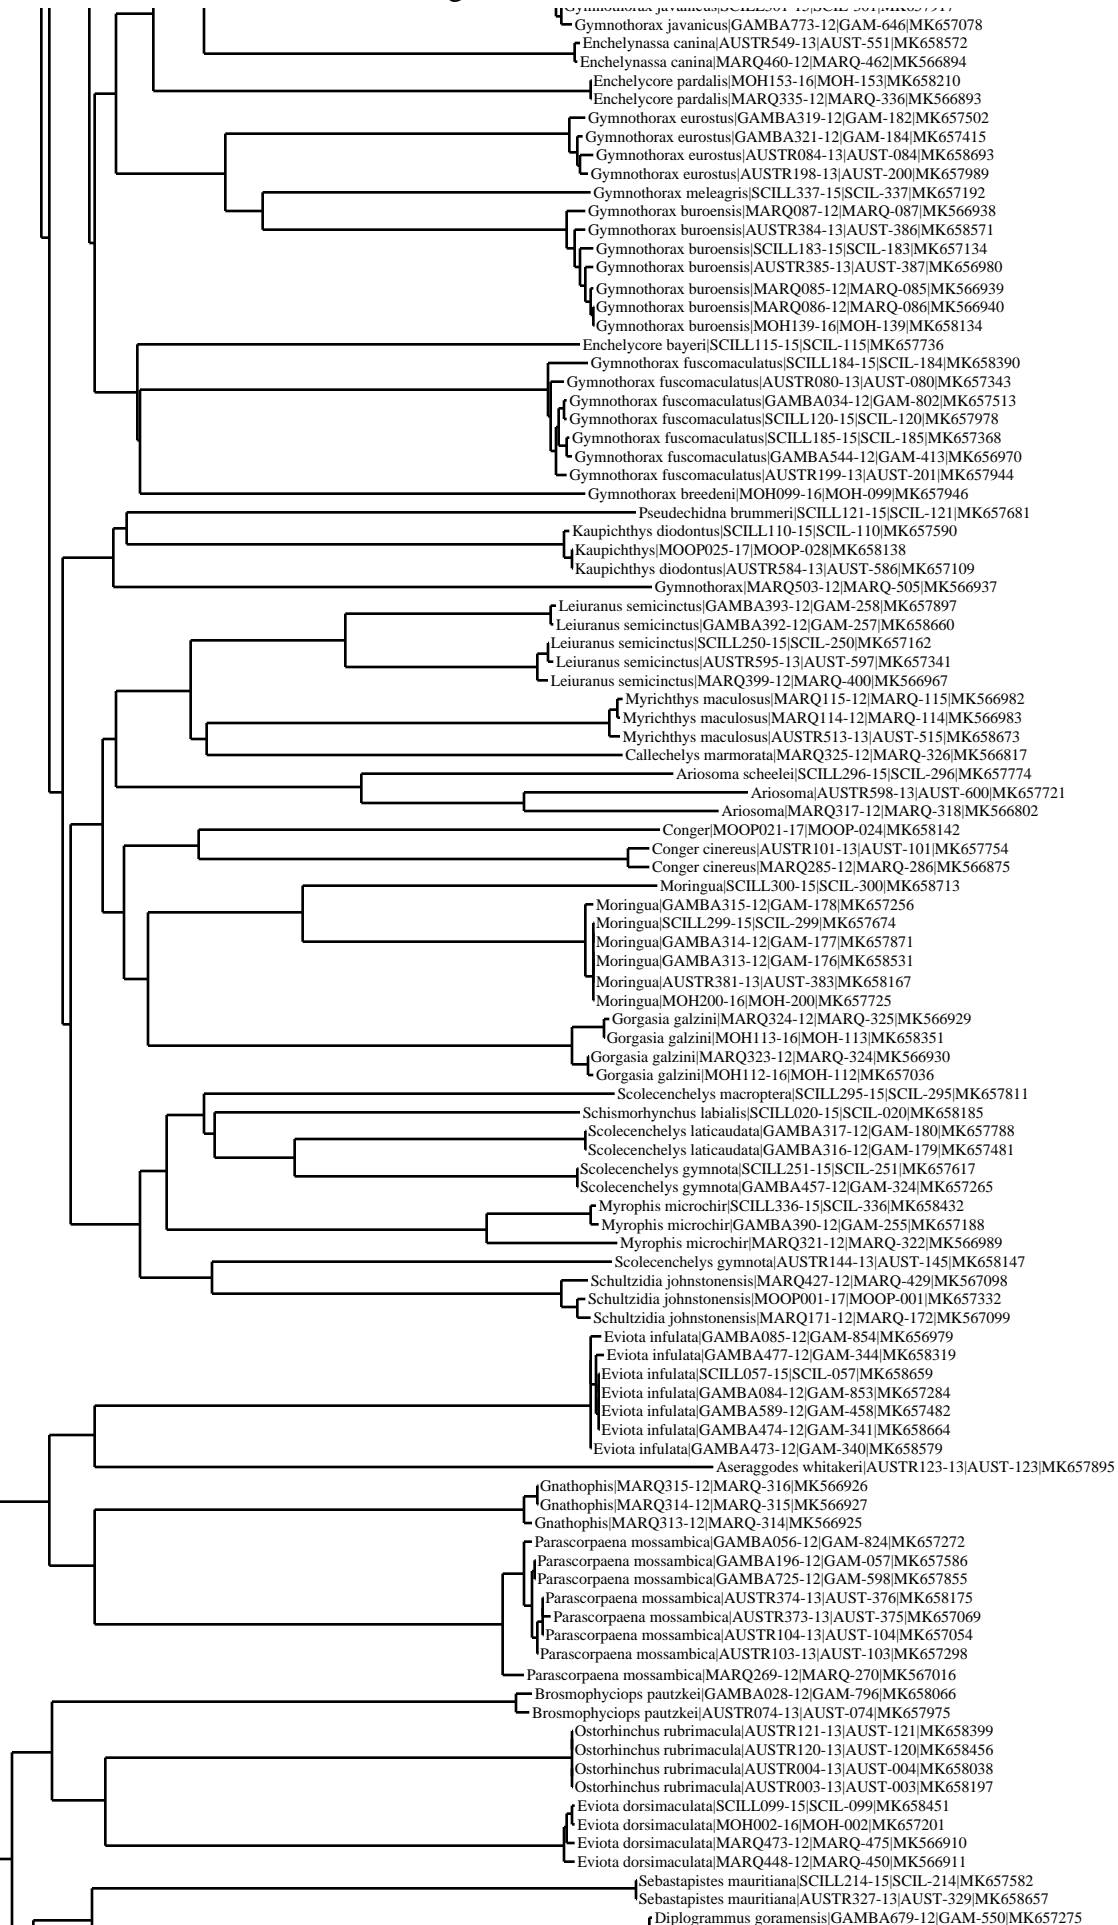

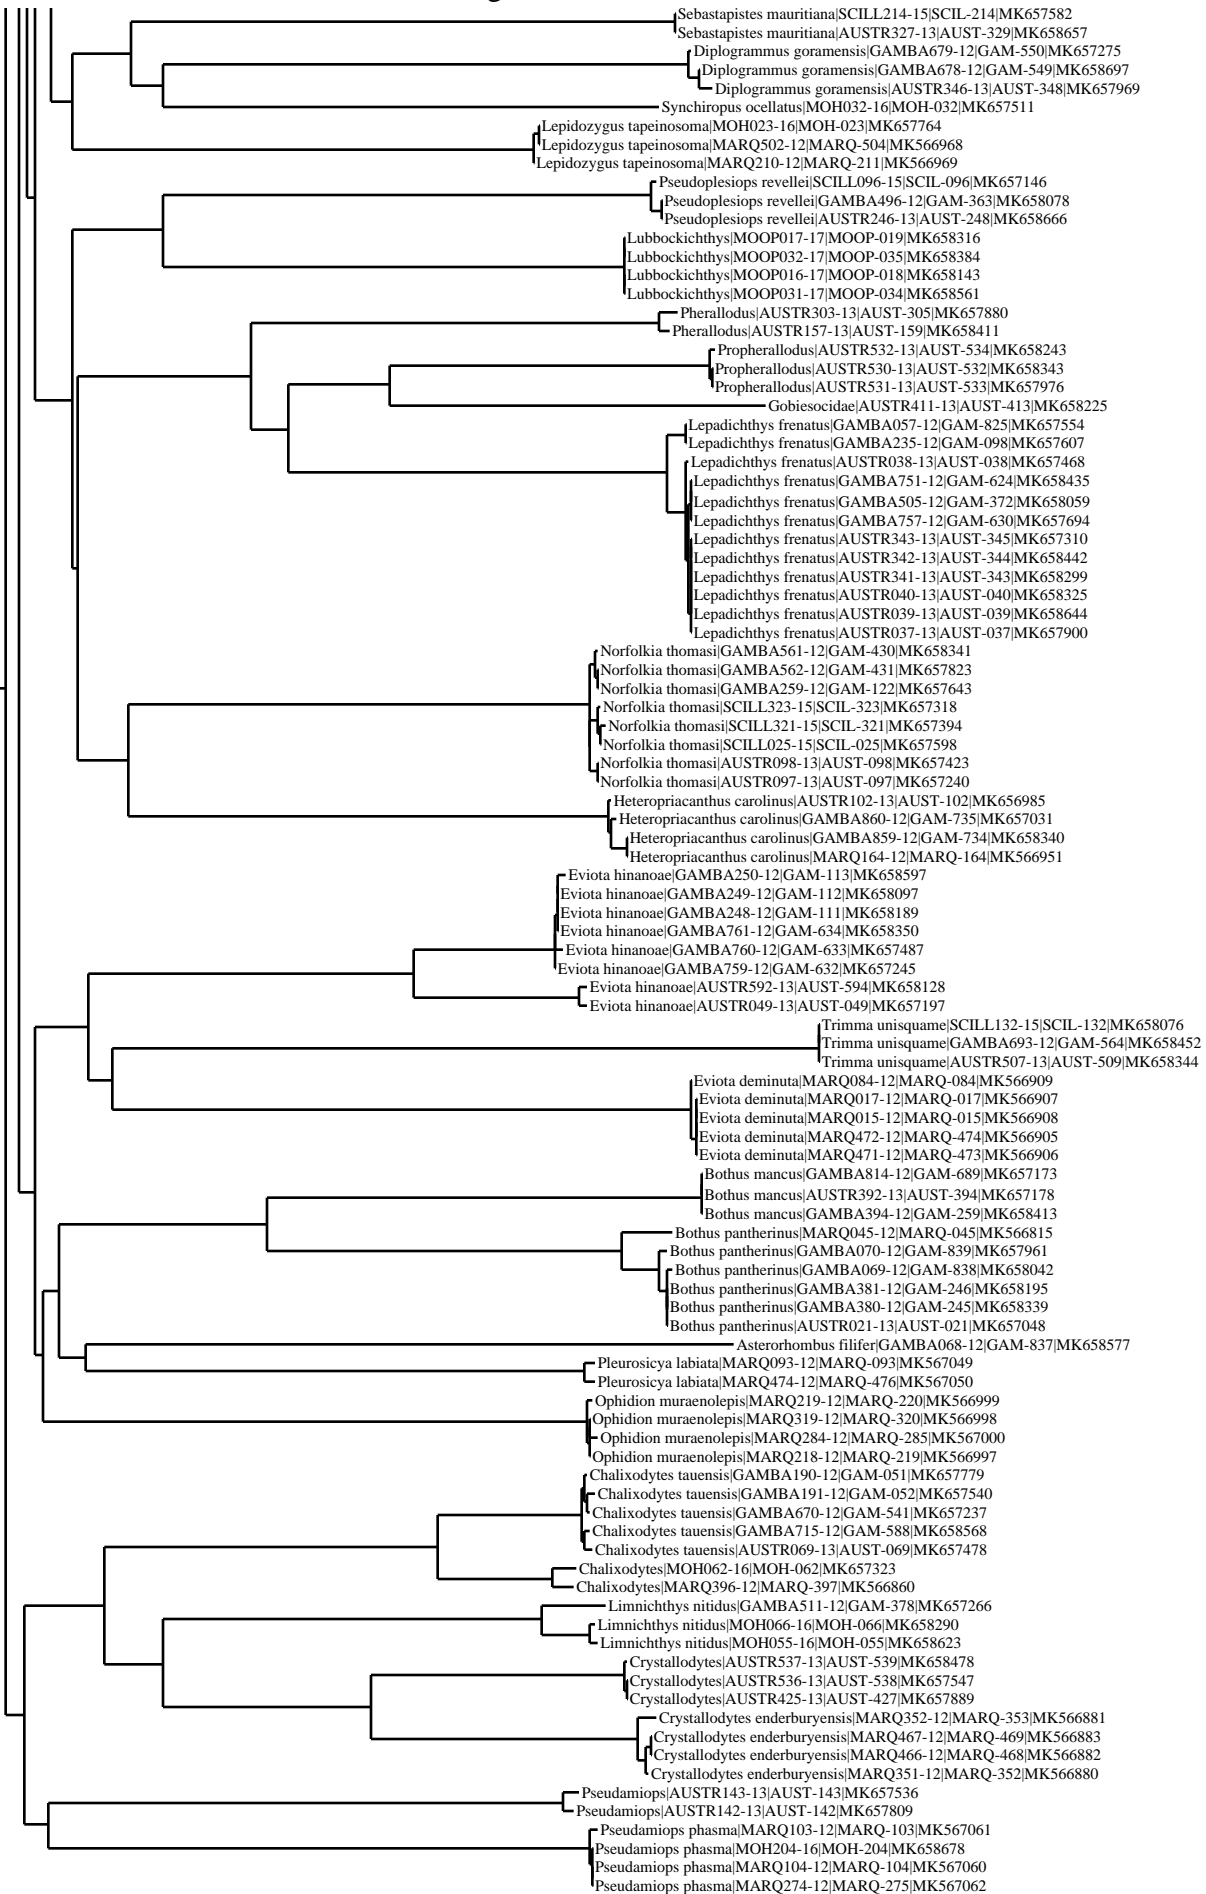

Supplement: Supplementary file [file media-1.pdf]
